# Supplementary material for: Formation drivers and photochemical effects of ClNO 2 in a coastal city of Southeast China
Source: Copernicus journal article supplement (doi:10.5194/egusphere-2024-1638), 2024-07-24
Supplement: Supplementary file 1 [file egusphere-2024-1638-supplement.pdf]

1 **Supplementary Information for**

2 **Formation drivers and photochemical effects of ClNO<sub>2</sub> in a coastal city of**  
3 **Southeast China**

4 Gaojie Chen<sup>1,4,5</sup>, Xiaolong Fan<sup>1,4</sup>, Haichao Wang<sup>2\*</sup>, Yee Jun Tham<sup>3</sup>, Ziyi Lin<sup>1,4,5</sup>, Xiaoting Ji<sup>1,4,5</sup>, Lingling Xu<sup>1,4</sup>,  
5 Baoye Hu<sup>6</sup>, Jinsheng Chen<sup>1,4\*</sup>

6  
7 <sup>1</sup>Center for Excellence in Regional Atmospheric Environment, Institute of Urban Environment, Chinese  
8 Academy of Sciences, Xiamen 361021, China

9 <sup>2</sup>School of Atmospheric Sciences, Sun Yat-sen University, Zhuhai 519082, China

10 <sup>3</sup>School of Marine Sciences, Sun Yat-sen University, Zhuhai 519082, China

11 <sup>4</sup>Fujian Key Laboratory of Atmospheric Ozone Pollution Prevention, Institute of Urban Environment, Chinese  
12 Academy of Sciences, Xiamen 361021, China

13 <sup>5</sup>University of Chinese Academy of Sciences, Beijing 100049, China

14 <sup>6</sup>Minnan Normal University, Zhangzhou 363000, China

15  
16 \*Correspondence to: Jinsheng Chen ([jschen@iue.ac.cn](mailto:jschen@iue.ac.cn)); Haichao Wang ([wanghch27@mail.sysu.edu.cn](mailto:wanghch27@mail.sysu.edu.cn)).  
17  
18  
19  
20  
21  
22  
23  
24  
25  
26

27

28 **Captions:**

29 **Text S1.** Detailed information of this observation site and instruments.

30 **Text S2.** The calibrations of ClNO<sub>2</sub> and N<sub>2</sub>O<sub>5</sub> and uncertainty analysis.

31 **Text S3.** The model configuration of machine learning.

32 **Text S4.** The box model configuration.

33 **Fig. S1** Measurement locations. (a) Location of Xiamen City in the southeast of China. (b) Location of the  
34 measurement site in Xiamen.

35 **Fig. S2** The dependences of ClNO<sub>2</sub> and N<sub>2</sub>O<sub>5</sub> sensitivity on relative humidity.

36 **Fig. S3** Comparison of observed ClNO<sub>2</sub> concentrations and simulated concentrations of ClNO<sub>2</sub> by the  
37 XGBoost model.

38 **Fig. S4** RO<sub>x</sub> (OH + HO<sub>2</sub> + RO<sub>2</sub>) radicals production rates induced by ClNO<sub>2</sub> photolysis under the observation-  
39 average conditions and the high ClNO<sub>2</sub> case.

40 **Fig. S5** Increased percentages of RO<sub>x</sub> (OH, HO<sub>2</sub>, RO<sub>2</sub>) radicals induced by ClNO<sub>2</sub> photolysis under the  
41 observation-average and case conditions.

42 **Table S1.** Measurement techniques, time resolutions, and detection limit of observation instruments at our  
43 study site.

44 **Table S2.** The observation data used in the box model under the observation-average conditions and the high  
45 ClNO<sub>2</sub> case (Unit: ppb).

46 **Table S3.** Summary of ClNO<sub>2</sub> peak concentrations at different types of sites in China and other countries (Unit:  
47 ppb).

48

49

50

51

53 **Text S1.** Detailed information of this observation site and instruments.

54 The observation site is on the top of the teaching building (over 70 meters) of Institute of Urban  
55 Environment, Chinese Academy of Sciences in Xiamen, surrounded by school and residential buildings,  
56 Xinglin Bay, and several major transportation roads (Fig.S1). The observation site, called as the Atmospheric  
57 Observation Supersite, is equipped with complete measurement instruments to observe trace gases, aerosol  
58 compositions, and meteorological parameters. The continuous gas analyzers (Thermo Fisher Scientific, USA)  
59 were employed to measure O<sub>3</sub> (TEI 49*i*), CO (TEI 48*i*), SO<sub>2</sub> (TEI 43*i*), and NO<sub>x</sub> (TEI 42*i*). VOC species were  
60 detected by a gas chromatography system equipped with a mass spectrometer and flame ionization detector  
61 (GC-MS/FID, TH-300B, Wuhan, China). PM<sub>2.5</sub> mass concentrations and its inorganic compositions (NO<sub>3</sub><sup>-</sup>,  
62 SO<sub>4</sub><sup>2-</sup>, NH<sub>4</sub><sup>+</sup>, and Cl<sup>-</sup>) were monitored using the tapered element oscillating microbalance (TEOM1405,  
63 Thermo Scientific Corp., MA, USA) and the Monitor for AeRosols and Gases in ambient Air (MARGA; ADI  
64 2080, Applikon Analytical B.V., the Netherlands), respectively. The particle surface area concentrations (*S<sub>a</sub>*)  
65 were obtained from the ambient particle number size distribution detecting by the Scanning Mobility Particle  
66 Sizer (SMPS, TSI Inc.) and Aerodynamic Particle Size Spectrometer (APS). Meteorological factors, including  
67 air temperature (T), relative humidity (RH), atmospheric pressure (P), ultraviolet radiation (UV), wind speed  
68 (WS), and wind direction (WD) were measured by the weather station with a sonic anemometer (150WX,  
69 Airmar, USA). The data of boundary layer height (BLH) was gotten from the European Centre for Medium-  
70 Range Weather Forecasts (ECMWF) ERA5 hourly reanalysis dataset. Photolysis frequency (including *J*(O<sup>1</sup>D),  
71 *J*(NO<sub>2</sub>), *J*(HCHO), *J*(HONO), *J*(NO<sub>3</sub>), and *J*(H<sub>2</sub>O<sub>2</sub>)) were detected by a photolysis spectrometer (PFS-100,  
72 Focused Photonics Inc., Hangzhou, China). The HCHO analyzer (FMS-100, Focused Photonics Inc.,  
73 Hangzhou, China) was used to observe the concentrations of HCHO.

74 The concentrations of ClNO<sub>2</sub> and N<sub>2</sub>O<sub>5</sub> were measured by an iodide-adduct Chemical Ionization-  
75 Atmospheric Pressure Interface-Long Time of Flight (Aerodyne Research Inc, USA and ToFwerk AG,  
76 Switzerland) mass spectrometer (I<sup>-</sup>-ToF-CIMS). The ambient air is drawn into the sampling chamber through  
77 a perfluoroalkoxy (PFA) pipeline, approximately 2 meters in length with an inner diameter of 1/4 inch, at a  
78 flow rate of 10 standard liters per minute (SLPM). Subsamples of approximately 2 SLPM are then introduced  
79 into the CIMS setting. Within this setup, methyl iodine gas (CH<sub>3</sub>I) emitted from the heated CH<sub>3</sub>I permeation  
80 tube (VICI) undergoes ionization as it passes through a soft X-ray ionization source (ToFwerk AG, P-type),  
81 carried by an ultra-high purity nitrogen gas (N<sub>2</sub>) flow at 99.999% purity and a rate of 2.7 SLPM. Reagent ions  
82 (I<sup>-</sup> and I(H<sub>2</sub>O)<sup>-</sup>) selectively participate in the ion-molecule reaction (IMR) chamber with the target gas,

83 producing iodide clusters in the IMR chamber. These clusters are then quantified using the  $\Gamma^-$ -ToF-CIMS  
84 instrument. The background signals of the CIMS instrument were determined by introducing dry  $N_2$  into the  
85 inlet for a duration of 20 minutes. To prevent the buildup of particulate matter on the inlet tubing, we replaced  
86 the tubing weekly and flushed it with deionized water, followed by a 20-minute stream of  $N_2$  for drying.  
87 Additionally, to reduce interference from the sampling inlet, we utilized a pump with a flow rate of 10 SLPM  
88 to draw the ambient sample.

## 90 **Text S2. The calibrations of $ClNO_2$ and $N_2O_5$ and uncertainty analysis.**

91 In our study, the calibrations of  $ClNO_2$  and  $N_2O_5$  were based on previous established methods (Thaler et  
92 al., 2011; Wang et al., 2016; Wang et al., 2022). A nitrogen ( $N_2$ ) flow at a rate of  $50 \text{ mL} \cdot \text{min}^{-1}$ , containing 6  
93 ppm of  $Cl_2$ , was directed over a slurry composed of sodium nitrite ( $NaNO_2$ ) and sodium chloride ( $NaCl$ ). This  
94 slurry facilitated the production of  $ClNO_2$ , with  $NaCl$  added to minimize  $NO_2$  formation as a secondary  
95 product. Subsequently, the resulting mixture containing  $ClNO_2$  was conditioned to a specified RH and then  
96 sampled using the CIMS instrument. To quantify the concentrations of  $ClNO_2$ , the mixed flow was directly  
97 fed into a cavity attenuated phase shift spectroscopy (CAPS) instrument to measure the baseline levels of  $NO_2$ ,  
98 subsequently, it was passed through a thermal dissociation tube heated to  $380 \text{ }^\circ\text{C}$ , causing  $ClNO_2$  to decompose  
99 into  $NO_2$ , determined by the CAPS instrument. The differences in measured  $NO_2$  concentrations between with  
100 and without thermal dissociation corresponded to the concentrations of  $ClNO_2$ . For the calibration of  $N_2O_5$ ,  
101  $O_3$  was generated by passing approximately 30 sccm of ultrapure zero air through a mercury lamp (UVP).  $O_3$   
102 then reacted with a 30 sccm flow rate of  $NO_2$  to produce  $NO_3$ , which subsequently reacted with  $NO_2$  to yield  
103 a flow of  $N_2O_5$ . This  $N_2O_5$ -enriched flow was utilized to calibrate the CIMS measurements of  $N_2O_5$ . By  
104 adjusting the RH, a mixed flow containing stable  $N_2O_5$  was introduced into the CIMS instrument, allowing  
105 for the acquisition of a normalized humidity-dependent curve for  $N_2O_5$ . Although the absolute concentrations  
106 of the  $N_2O_5$  source were not directly quantified due to the absence of an  $N_2O_5$ -specific detector, the  $N_2O_5$ -  
107 enriched flow was passed through a supersaturated  $NaCl$  solution assuming 100% conversion efficiency from  
108  $N_2O_5$  to  $ClNO_2$ . The dependences of  $ClNO_2$  and  $N_2O_5$  sensitivity on RH are shown in Fig. S2, indicating that  
109 the sensitivities of  $ClNO_2$  and  $N_2O_5$  depended on the variations of RH values. The sensitivities of  $ClNO_2$  and  
110  $N_2O_5$  were  $0.055 \pm 0.018$  and  $0.11 \pm 0.063 \text{ ncps} \cdot \text{ppb}^{-1}$ , respectively. The detection limit ( $3\sigma$ ) of  $ClNO_2$  and  
111  $N_2O_5$  was 1.3 and 0.61 ppt, respectively.

### Text S3. The model configuration of machine learning.

The gradient boosted tree implemented from XGBoost was chosen as machine learning methods. It has been optimized to run in distributed computing environment and can handle a large amount of input data. Compared to neural networks, the results of gradient boosting tree models are more interpretable, enabling them to link the results with the recognizable chemical features. The XGBoost algorithm is a tree-based machine learning model known for its excellent performance in speed and accuracy. It can aggregate weak learners into a strong model, enhancing single generalization ability and robustness, thereby improving prediction accuracy.

In this study, ClNO<sub>2</sub> concentrations are as dependent variable, and trace gases (SO<sub>2</sub>, CO, NO<sub>2</sub>, NO, O<sub>3</sub>, and N<sub>2</sub>O<sub>5</sub>), PM<sub>2.5</sub>, inorganic compositions (NO<sub>3</sub><sup>-</sup>, SO<sub>4</sub><sup>2-</sup>, NH<sub>4</sub><sup>+</sup>, and Cl<sup>-</sup>), and meteorological parameters (T, RH, UV, WS, WD, and BLH) are as the argument. In the XGBoost model, 70% of the observed data are used as the training set, and the rest 30% data are used as the testing set. Five cross-validation is employed to adjust hyperparameters to stabilize the predictive ability of the model. The adjusted hyperparameters include maximum depth, learning rate, gamma, minimum child weight, and estimate. R<sup>2</sup>, mean square error (MSE), and root mean square error (RMSE) are used to assess the model performance. The Shapely additive explanations (SHAP) model is an interpreter package designed to investigate the contributions of each feature to the model predictions. Its approach involves an additive explanatory model which treats all features as contributors, a concept inspired by cooperative game theory. For each predicted sample, the SHAP model provides a Shapley value, which is the sum of the values assigned to each feature.

### Text S4. The box model configuration and output.

The observation-based model (OBM) coupled with the Master Chemical Mechanism (MCM) version 3.3.1 was utilized to assess the impacts of ClNO<sub>2</sub> on photochemically atmospheric oxidation. As delineated in earlier studies (Xue et al., 2015; Tham et al., 2016; Xia et al., 2021; Peng et al., 2021; Peng et al., 2022), established chlorine chemistry mechanisms have been integrated. The impacts of dilution mixing were included for all species by introducing a dilution factor, defined as a function of the variation of the planetary boundary layer (PBL) height. In our study, ClNO<sub>2</sub>, N<sub>2</sub>O<sub>5</sub>, VOCs, HCHO, HONO, CO, O<sub>3</sub>, NO, NO<sub>2</sub>, SO<sub>2</sub>, along with meteorological factors as observation constrained were input into the box model at an hourly resolution. We performed the OBM for 5 days to initialize the unconstrained compounds and radicals before starting the simulation. We focused on elucidating the influence of ClNO<sub>2</sub> photolysis on the formation of RO<sub>x</sub> radicals and O<sub>3</sub>, the AOC. Generally, the reactions of HO<sub>2</sub> + NO and RO<sub>2</sub> + NO are the major O<sub>3</sub> production

145 pathways (Eq.1), and the O<sub>3</sub> loss pathways (Eq.2) include NO<sub>2</sub> + OH/RO<sub>2</sub>, O<sub>3</sub> photolysis, O<sub>3</sub> + OH/HO<sub>2</sub>  
 146 radicals, O<sub>3</sub>/NO<sub>3</sub>+ VOCs. The O<sub>3</sub> production rate minus the O<sub>3</sub> loss rate was used to calculate the net O<sub>3</sub>  
 147 production rate (Eq.3).

$$148 \quad P(O_3) = k_1[HO_2][NO] + \sum(k_2[RO_2][NO]) \quad (1)$$

$$149 \quad L(O_3) = k_3[O_1D][H_2O] + k_4[O_3][OH] + k_5[O_3][HO_2] + k_6[NO_2][OH] + \sum(k_7[O_3][VOCs]) +$$

$$150 \quad 2 \sum(k_8[NO_3][VOCs]) \quad (2)$$

$$151 \quad P_{net}(O_3) = P(O_3) - L(O_3) \quad (3)$$

152 Where,  $k_i$  stands for the rate constant.

153 The AOC is calculated by the sum of the rates of CH<sub>4</sub>, CO, and VOCs oxidized by atmospheric oxidants  
 154 (O<sub>3</sub>, OH, Cl, and NO<sub>3</sub> radicals) (Xue et al., 2015; Yi et al., 2023), used by Eq. (4).

$$155 \quad AOC = \sum_i k_{Y_i}[Y_i][X] \quad (4)$$

156 Where,  $[Y_i]$  is the concentrations of reduced species (VOCs, CO, and CH<sub>4</sub>),  $[X]$  is the concentrations of  
 157 oxidants (O<sub>3</sub>, OH, Cl, and NO<sub>3</sub> radicals), and  $k_{Y_i}$  represents the reaction rate constant of  $Y_i$  and  $X$ .

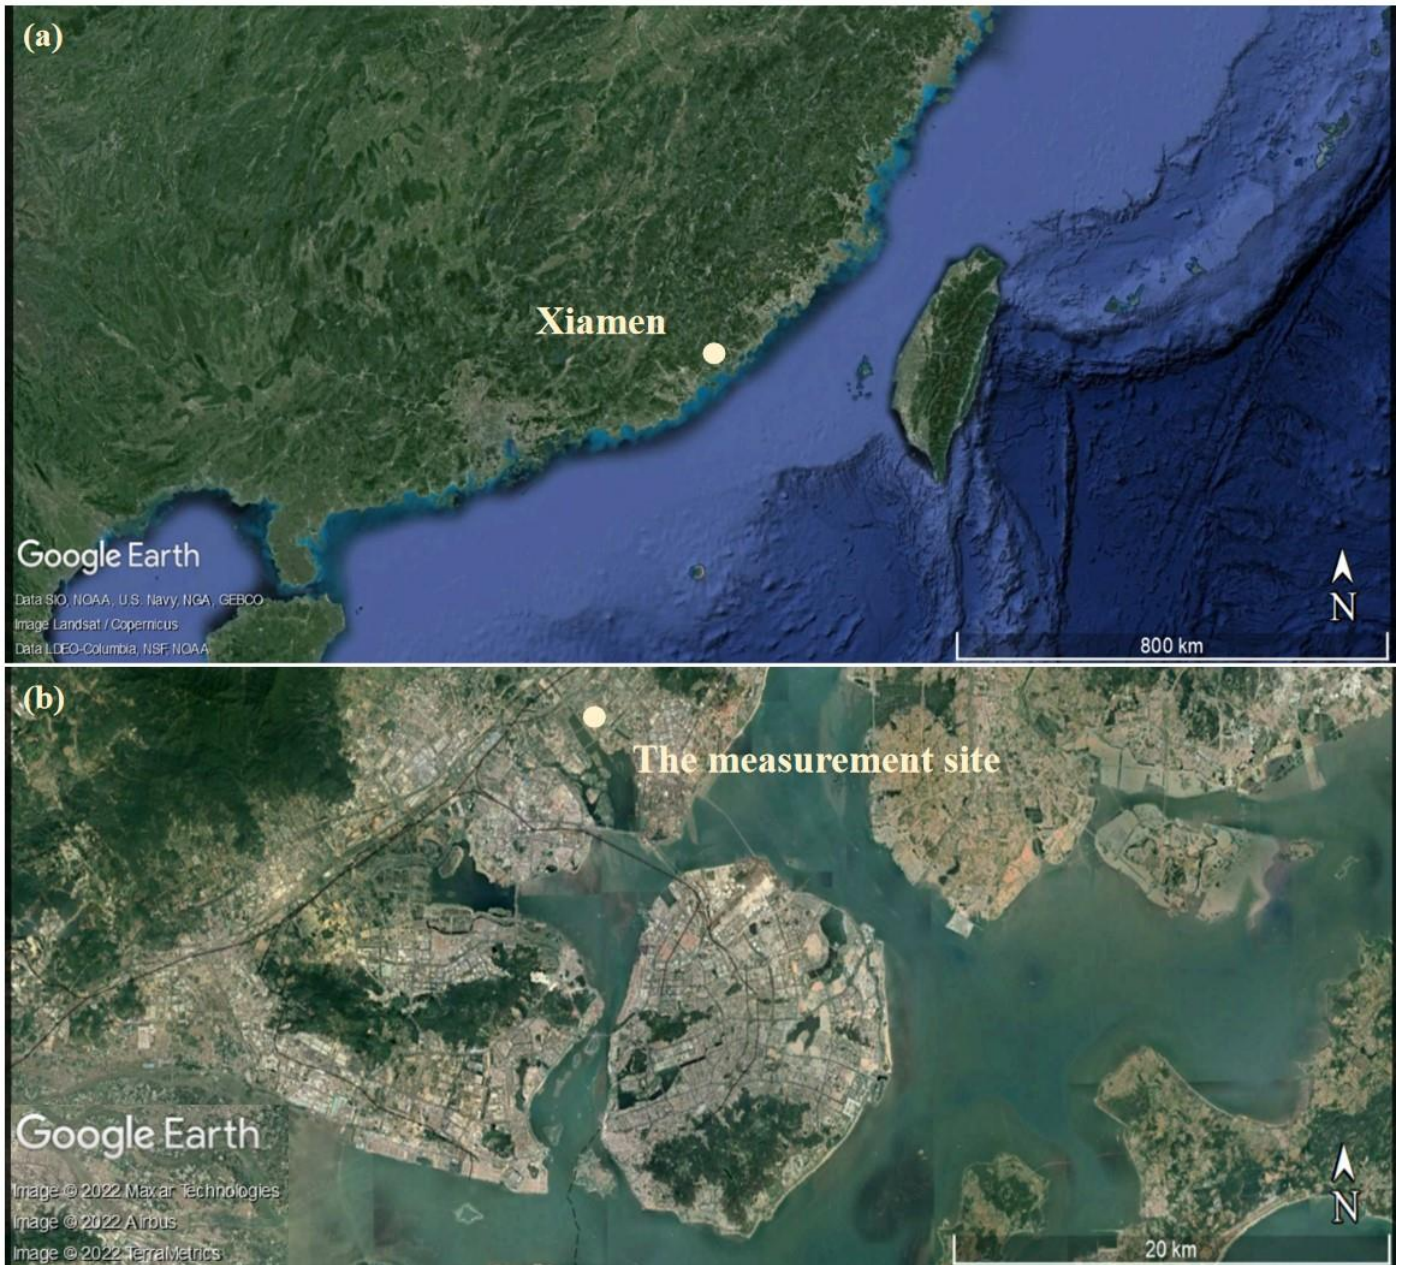

158  
159 **Fig. S1** Measurement locations. (a) Xiamen City in the southeast of China. (b) Location of the measurement  
160 site in Xiamen. (The topographic image is provided by © Google Earth.)  
161  
162  
163  
164  
165

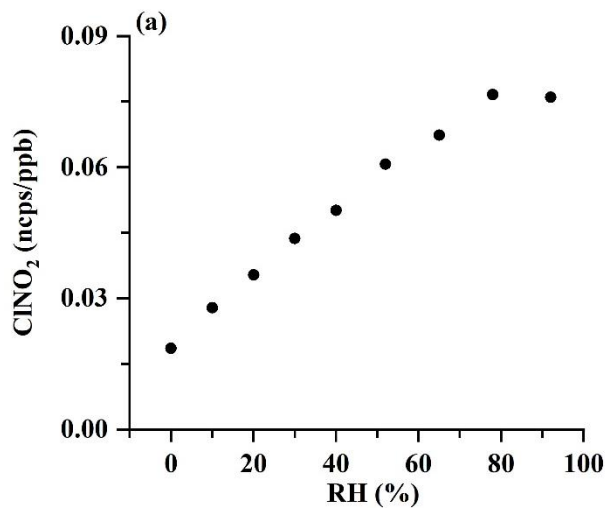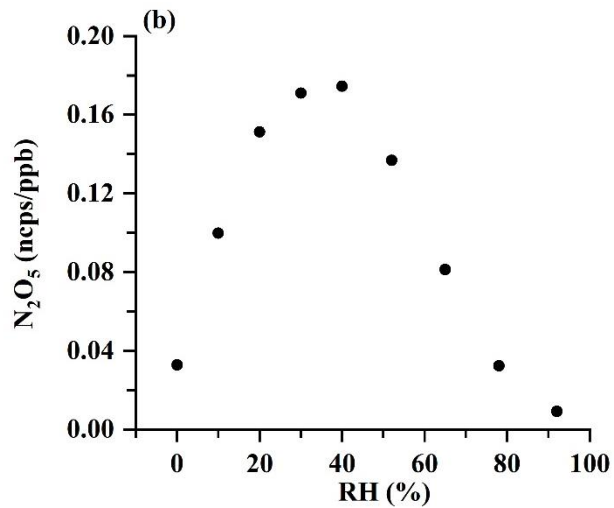

**Fig. S2** The dependences of ClNO<sub>2</sub> and N<sub>2</sub>O<sub>5</sub> sensitivity on relative humidity.



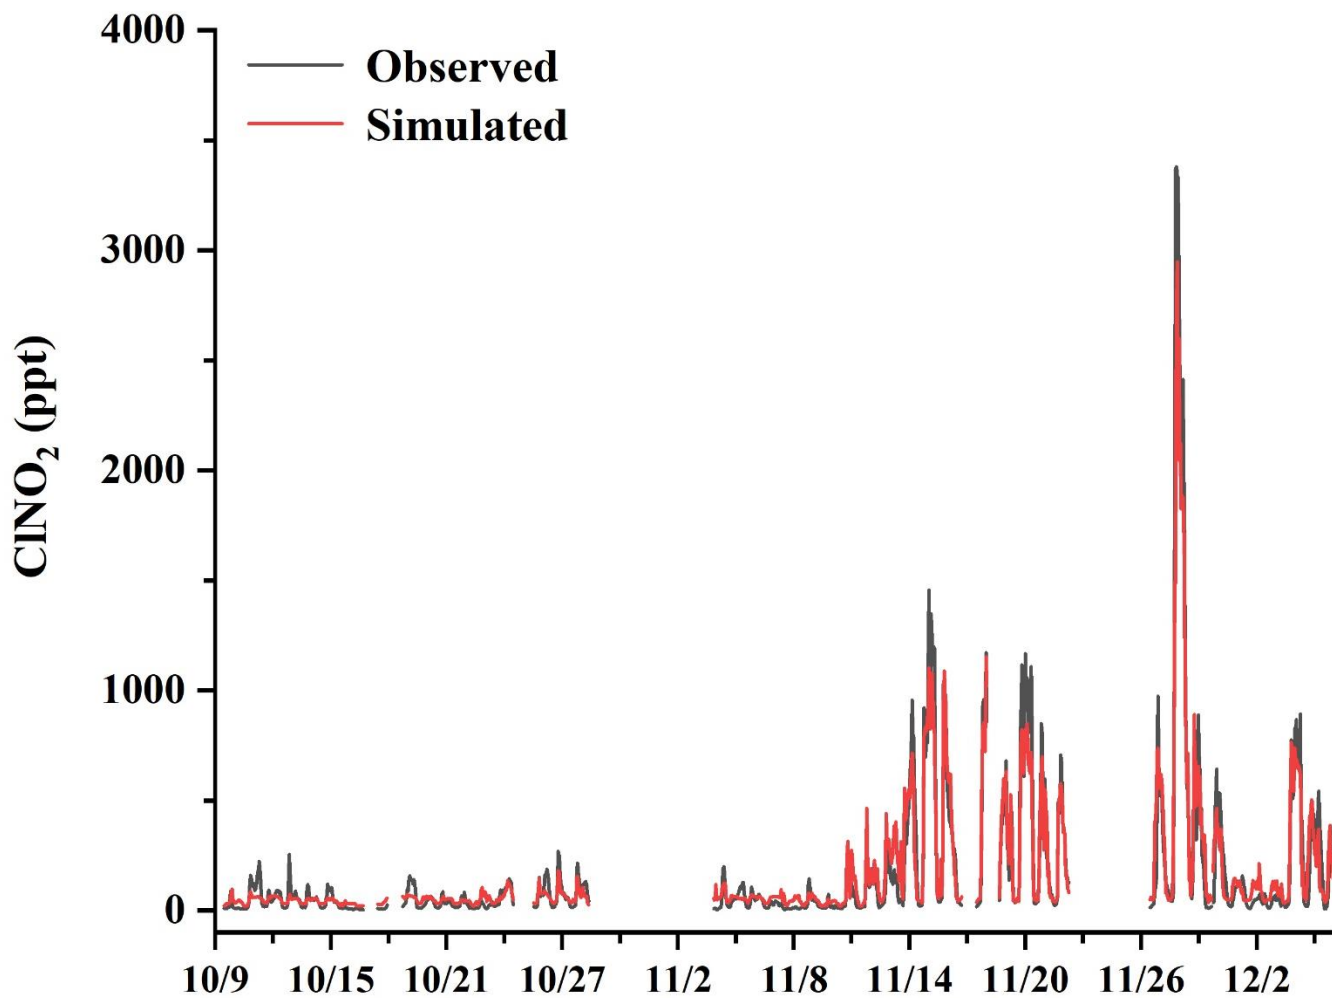

189  
190 **Fig. S3** Comparison of observed ClNO<sub>2</sub> concentrations and simulated concentrations of ClNO<sub>2</sub> by the  
191 XGBoost model.

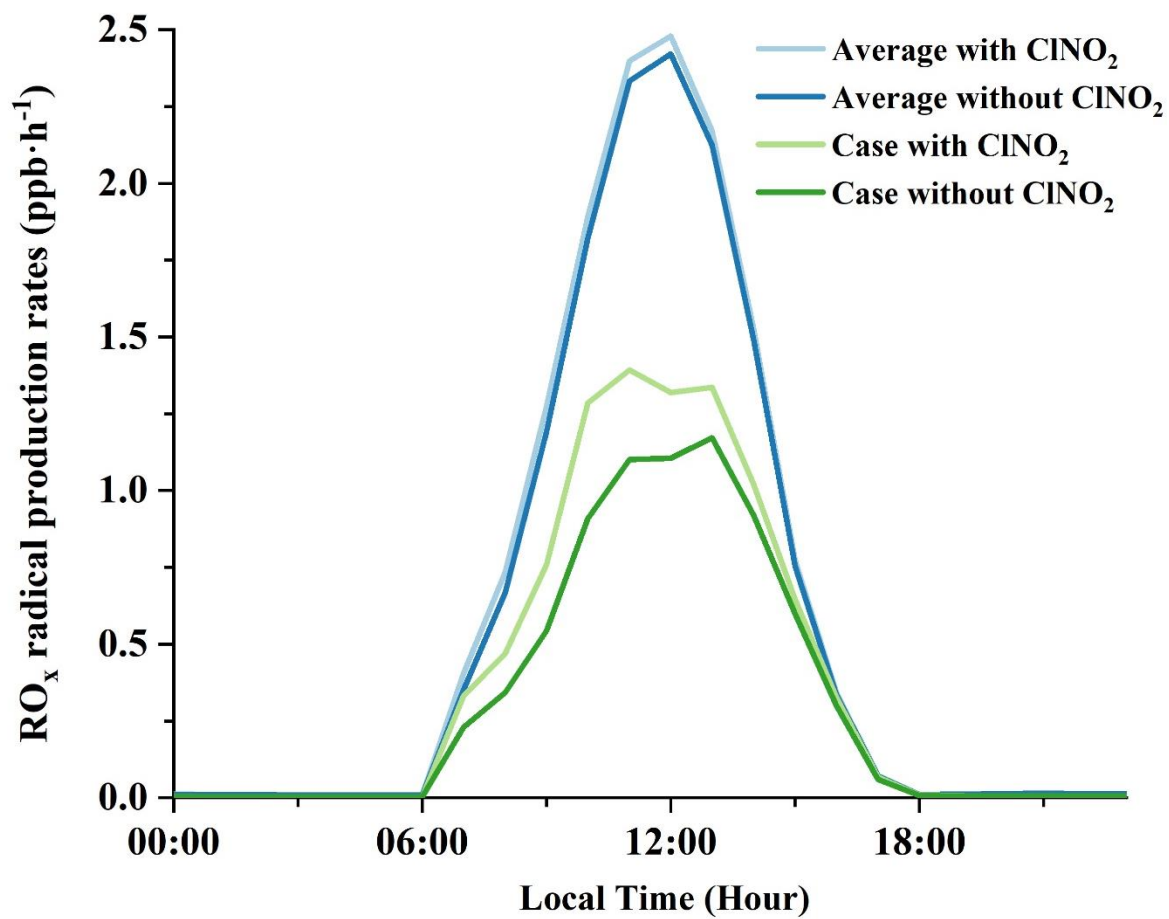

200  
201 **Fig. S4** RO<sub>x</sub> (OH + HO<sub>2</sub> + RO<sub>2</sub>) radicals production rates induced by ClNO<sub>2</sub> photolysis under the observation-  
202 average conditions and the high ClNO<sub>2</sub> case.  
203

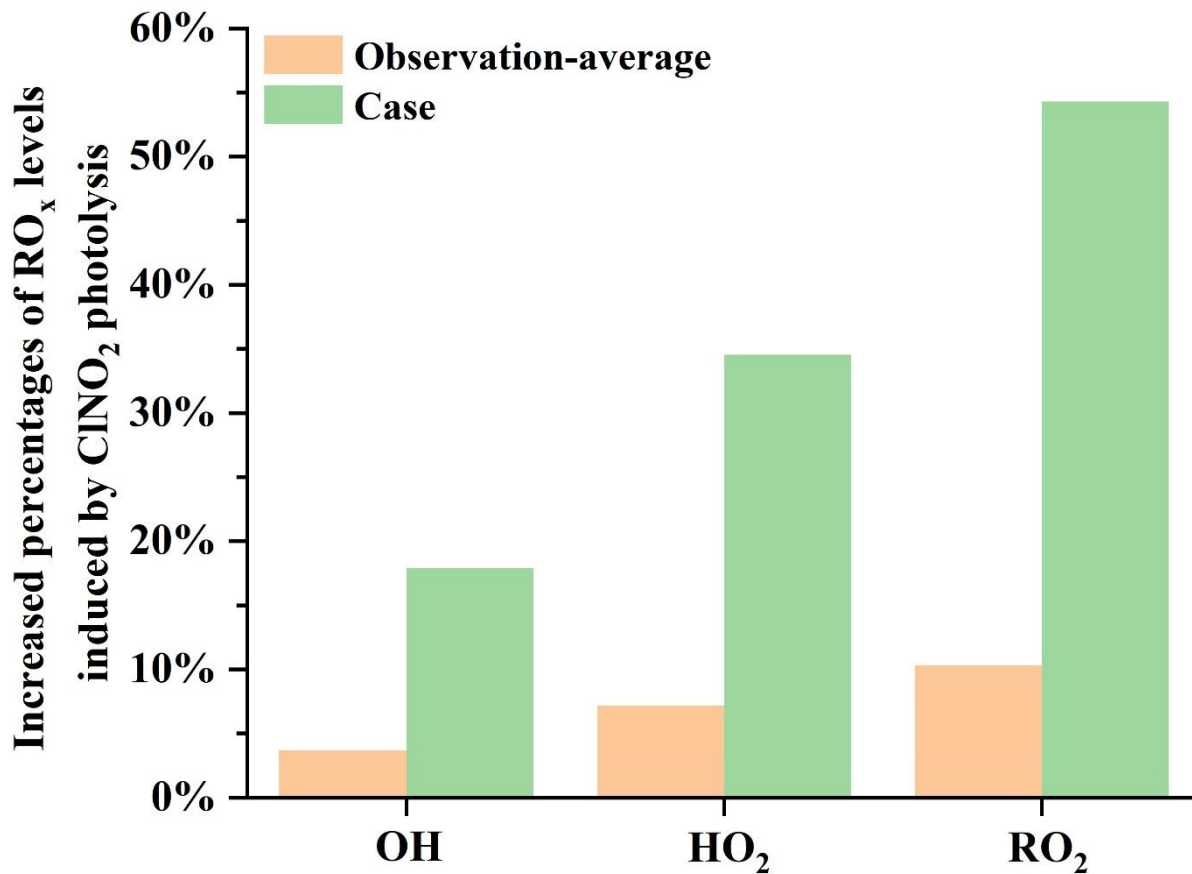

**Fig. S5** Increased percentages of RO<sub>x</sub> (OH, HO<sub>2</sub>, RO<sub>2</sub>) radicals induced by ClNO<sub>2</sub> photolysis under the observation-average conditions and the high ClNO<sub>2</sub> case.

217 **Table S1.** Measurement techniques, time resolutions, and detection limit of observation instruments at our  
 218 study site.

| Parameters                                                                                                                                                                   | Techniques               | Time resolutions | Limit of detection |
|------------------------------------------------------------------------------------------------------------------------------------------------------------------------------|--------------------------|------------------|--------------------|
| ClNO <sub>2</sub> and N <sub>2</sub> O <sub>5</sub>                                                                                                                          | I <sup>-</sup> -ToF-CIMS | 1 min            | ~ 1 ppt            |
| CH <sub>4</sub>                                                                                                                                                              | NCMS6300                 | 15 min           | 21 ppb             |
| VOCs                                                                                                                                                                         | GC-MS/FID                | 1 hour           | 0.02-0.30 ppb      |
| HCHO                                                                                                                                                                         | Hantzsch fluorimetry     | 1 s              | 0.05 ppb           |
| <i>J</i> (O <sup>1</sup> D), <i>J</i> (NO <sub>2</sub> ),<br><i>J</i> (HONO), <i>J</i> (NO <sub>3</sub> ),<br><i>J</i> (HCHO), and <i>J</i> (H <sub>2</sub> O <sub>2</sub> ) | Photolysis spectrometer  | 8 s              | a                  |
| CO                                                                                                                                                                           | Infrared absorption      | 1 min            | 40.00 ppb          |
| SO <sub>2</sub>                                                                                                                                                              | Pulsed UV fluorescence   | 1 min            | 0.50 ppb           |
| O <sub>3</sub>                                                                                                                                                               | UV photometry            | 1 min            | 1.00 ppb           |
| NO                                                                                                                                                                           | Chemiluminescence        | 1 min            | 0.50 ppb           |
| NO <sub>2</sub>                                                                                                                                                              | Chemiluminescence        | 1 min            | 0.50 ppb           |

219 a. Process-specific, 5 orders of magnitude lower than maximum at noon.

220

221

222

223

224

225

226

227

228

229

230

231

232

233 **Table S2.** The observation data used in the box model under the observation-average conditions and the high  
 234 ClNO<sub>2</sub> case (Unit: ppb).

| Parameters      | Average | Case   | Parameters                          | Average  | Case     |
|-----------------|---------|--------|-------------------------------------|----------|----------|
| T (K)           | 296.77  | 295.63 | M2HEX                               | 0.04     | 0.04     |
| RH (%)          | 65.98   | 88.48  | M3HEX                               | 0.06     | 0.08     |
| SO <sub>2</sub> | 1.93    | 2.34   | NC7H16                              | 0.06     | 0.06     |
| NO <sub>2</sub> | 12.94   | 26.38  | TOLUENE                             | 1.12     | 1.73     |
| NO              | 3.19    | 5.85   | NC8H18                              | 0.02     | 0.02     |
| CO              | 461.59  | 769.56 | PXYL                                | 0.40     | 0.73     |
| O <sub>3</sub>  | 31.07   | 11.43  | EBENZ                               | 0.19     | 0.42     |
| C2H4            | 0.89    | 1.41   | NC9H20                              | 0.01     | 0.02     |
| C2H2            | 0.78    | 1.53   | STYRENE                             | 0.04     | 0.09     |
| C2H6            | 2.01    | 2.64   | OXYL                                | 0.11     | 0.20     |
| C3H6            | 0.24    | 0.23   | TM124B                              | 0.02     | 0.03     |
| C3H8            | 1.90    | 3.28   | TM123B                              | 0.01     | 0.01     |
| IC4H10          | 0.74    | 1.30   | NC11H24                             | 0.01     | 0.01     |
| BUT1ENE         | 0.05    | 0.06   | NC12H26                             | 0.02     | 0.03     |
| NC4H10          | 1.07    | 1.97   | HCHO                                | 2.50     | 3.92     |
| CBUT2ENE        | 0.02    | 0.03   | ACR                                 | 0.06     | 0.06     |
| TBUT2ENE        | 0.02    | 0.03   | CH3COCH3                            | 1.98     | 2.26     |
| IC5H12          | 0.61    | 1.46   | MEK                                 | 0.47     | 0.52     |
| NC5H12          | 0.27    | 0.50   | CH3CL                               | 0.39     | 0.33     |
| C5H8            | 0.02    | 0.02   | C4H6                                | 0.01     | 0.02     |
| M22C4           | 0.02    | 0.02   | IPOPOL                              | 0.17     | 0.11     |
| M23C4           | 0.05    | 0.06   | MTBE                                | 0.10     | 0.19     |
| M2PE            | 0.05    | 0.08   | ETHACET                             | 1.26     | 2.14     |
| M3PE            | 0.08    | 0.13   | JNO <sub>2</sub> (s <sup>-1</sup> ) | 0.002106 | 0.000981 |
| HEX1ENE         | 0.00    | 0.00   | ClNO <sub>2</sub>                   | 0.17     | 0.96     |
| NC6H14          | 0.09    | 0.15   | N <sub>2</sub> O <sub>5</sub>       | 0.02     | 0.01     |
| BENZENE         | 0.18    | 0.32   | Cl <sub>2</sub>                     | 0.01     | 0.05     |
| CHEX            | 0.02    | 0.02   | HONO                                | 0.48     | 0.77     |

235

236

237

238

240 **Table S3.** Summary of ClNO<sub>2</sub> peak concentrations at different types of sites in China and other countries (Unit:  
241 ppb).

| Observation Area | Observation Sites     | ClNO <sub>2</sub> | References |
|------------------|-----------------------|-------------------|------------|
| Wangdu, China    | Rural site            | ~3.5              | 1          |
| Beijing, China   | Urban site            | ~3.0              | 2          |
| Jinan, China     | Urban site            | ~0.8              | 3          |
| Mt. Tai, China   | Mountain site         | ~2.0              | 4          |
| Changzhou, China | Suburban site         | ~1.3              | 5          |
| Shanghai, China  | Urban site            | ~5.7              | 5          |
| Nanjing, China   | Rural site            | ~3.7              | 6          |
| Xiamen, China    | Urban site            | ~3.4              | This study |
| Heshan, China    | Rural site            | ~8.1              | 7          |
| Shenzhen, China  | Background site       | ~1.7              | 8          |
| Hong Kong, China | Mountain site         | ~4.7              | 9          |
| Seoul, Korea     | Urban site            | ~2.5              | 10         |
| Hesen, Germany   | Rural site            | ~0.8              | 11         |
| London, UK       | Urban site            | ~0.7              | 12         |
| Boulder, USA     | Urban site            | ~1.3              | 13         |
| Houston, USA     | Marine boundary layer | ~1.2              | 14         |
| Los Angeles, USA | Marine boundary layer | ~3.5              | 15         |
| Calgary, Canada  | Urban site            | ~0.3              | 16         |

242 The references as follows: 1 (Tham et al., 2016), 2 (Ma et al., 2023), 3 (Wang et al., 2017a), 4 (Wang et al.,  
243 2017b), 5 (Li et al., 2023), 6 (Xia et al., 2020), 7 (Yun et al., 2018), 8 (Niu et al., 2022), 9 (Wang et al., 2016),  
244 10 (Jeong et al., 2019), 11 (Phillips et al., 2012), 12 (Bannan et al., 2015), 13 (Thornton et al., 2010), 14  
245 (Osthoff et al., 2008), 15 (Riedel et al., 2012), 16 (Mielke et al., 2011).

255 **References**

256 Bannan, T. J., Booth, A. M., Bacak, A., Muller, J. B. A., Leather, K. E., Le Breton, M., Jones, B., Young, D.,  
257 Coe, H., Allan, J., Visser, S., Slowik, J. G., Furger, M., Prévôt, A. S. H., Lee, J., Dunmore, R. E., Hopkins, J.  
258 R., Hamilton, J. F., Lewis, A. C., Whalley, L. K., Sharp, T., Stone, D., Heard, D. E., Fleming, Z. L., Leigh, R.,  
259 Shallcross, D. E., and Percival, C. J.: The first UK measurements of nitryl chloride using a chemical ionization  
260 mass spectrometer in central London in the summer of 2012, and an investigation of the role of Cl atom  
261 oxidation, *J. Geophys. Res. Atmos.*, 120, 5638-5657, <https://doi.org/10.1002/2014jd022629>, 2015.

262 Jeong, D., Seco, R., Gu, D., Lee, Y., Nault, B. A., Knote, C. J., McGee, T., Sullivan, J. T., Jimenez, J. L.,  
263 Campuzano-Jost, P., Blake, D. R., Sanchez, D., Guenther, A. B., Tanner, D., Huey, L. G., Long, R., Anderson,  
264 B. E., Hall, S. R., Ullmann, K., Shin, H., Herndon, S. C., Lee, Y., Kim, D., Ahn, J., and Kim, S.: Integration  
265 of airborne and ground observations of nitryl chloride in the Seoul metropolitan area and the implications on  
266 regional oxidation capacity during KORUS-AQ 2016, *Atmos. Chem. Phys.*, 19, 12779-12795,  
267 <https://doi.org/10.5194/acp-19-12779-2019>, 2019.

268 Li, F., Huang, D. D., Nie, W., Tham, Y. J., Lou, S., Li, Y., Tian, L., Liu, Y., Zhou, M., and Wang, H. J. A. E.:  
269 Observation of nitrogen oxide-influenced chlorine chemistry and source analysis of Cl<sub>2</sub> in the Yangtze River  
270 Delta, China, *Atmos. Environ.*, 306, 119829, <https://doi.org/10.1016/j.atmosenv.2023.119829>, 2023.

271 Ma, W., Chen, X., Xia, M., Liu, Y., Wang, Y., Zhang, Y., Zheng, F., Zhan, J., Hua, C., Wang, Z. J. E. S., and  
272 Technology: Reactive Chlorine Species Advancing the Atmospheric Oxidation Capacities of Inland Urban  
273 Environments, *Environ. Sci. Technol.*, 57, 14638-14647, <https://doi.org/10.1021/acs.est.3c05169>, 2023.

274 Mielke, L. H., Furgeson, A., and Osthoff, H. D.: Observation of ClNO<sub>2</sub> in a Mid-Continental Urban  
275 Environment, *Environ. Sci. Technol.*, 45, 8889-8896, <https://doi.org/10.1021/es201955u>, 2011.

276 Niu, Y.-B., Zhu, B., He, L.-Y., Wang, Z., Lin, X.-Y., Tang, M.-X., and Huang, X.-F.: Fast Nocturnal  
277 Heterogeneous Chemistry in a Coastal Background Atmosphere and Its Implications for Daytime  
278 Photochemistry, *J. Geophys. Res. Atmos.*, 127, e2022JD036716, <https://doi.org/10.1029/2022JD036716>,  
279 2022.

280 Osthoff, H. D., Roberts, J. M., Ravishankara, A. R., Williams, E. J., Lerner, B. M., Sommariva, R., Bates, T.  
281 S., Coffman, D., Quinn, P. K., Dibb, J. E., Stark, H., Burkholder, J. B., Talukdar, R. K., Meagher, J., Fehsenfeld,

282 F. C., and Brown, S. S.: High levels of nitryl chloride in the polluted subtropical marine boundary layer, *Nat.*  
283 *Geosci.*, 1, 324-328, <https://doi.org/10.1038/ngeo177>, 2008.

284 Peng, X., Wang, T., Wang, W., Ravishankara, A., George, C., Xia, M., Cai, M., Li, Q., Salvador, C. M., and  
285 Lau, C. J. N. c.: Photodissociation of particulate nitrate as a source of daytime tropospheric Cl<sub>2</sub>, *Nat. Commun.*,  
286 13, 1-10, <https://doi.org/10.1038/s41467-022-28383-9>, 2022.

287 Peng, X., Wang, W., Xia, M., Chen, H., Ravishankara, A. R., Li, Q., Saiz-Lopez, A., Liu, P., Zhang, F., Zhang,  
288 C., Xue, L., Wang, X., George, C., Wang, J., Mu, Y., Chen, J., and Wang, T.: An unexpected large continental  
289 source of reactive bromine and chlorine with significant impact on wintertime air quality, *Natl. Sci. Rev.*, 8,  
290 nwaa304, <https://doi.org/10.1093/nsr/nwaa304>, 2021.

291 Phillips, G. J., Tang, M. J., Thieser, J., Brickwedde, B., Schuster, G., Bohn, B., Lelieveld, J., and Crowley, J.  
292 N.: Significant concentrations of nitryl chloride observed in rural continental Europe associated with the  
293 influence of sea salt chloride and anthropogenic emissions, *Geophys. Res. Lett.*, 39, L10811,  
294 <https://doi.org/10.1029/2012gl051912>, 2012.

295 Riedel, T. P., Bertram, T. H., Crisp, T. A., Williams, E. J., Lerner, B. M., Vlasenko, A., Li, S. M., Gilman, J.,  
296 de Gouw, J., Bon, D. M., Wagner, N. L., Brown, S. S., and Thornton, J. A.: Nitryl chloride and molecular  
297 chlorine in the coastal marine boundary layer, *Environ. Sci. Technol.*, 46, 10463-10470,  
298 <https://doi.org/10.1021/es204632r>, 2012.

299 Thaler, R. D., Mielke, L. H., and Osthoff, H. D.: Quantification of nitryl chloride at part per trillion mixing  
300 ratios by thermal dissociation cavity ring-down spectroscopy, *Anal. Chem.*, 83, 2761-2766,  
301 <https://doi.org/10.1021/ac200055z>, 2011.

302 Tham, Y. J., Wang, Z., Li, Q., Yun, H., Wang, W., Wang, X., Xue, L., Lu, K., Ma, N., Bohn, B., Li, X., Kecorius,  
303 S., Größ, J., Shao, M., Wiedensohler, A., Zhang, Y., and Wang, T.: Significant concentrations of nitryl chloride  
304 sustained in the morning: investigations of the causes and impacts on ozone production in a polluted region  
305 of northern China, *Atmos. Chem. Phys.*, 16, 14959-14977, <https://doi.org/10.5194/acp-16-14959-2016>, 2016.

306 Thornton, J. A., Kercher, J. P., Riedel, T. P., Wagner, N. L., Cozic, J., Holloway, J. S., Dubé, W. P., Wolfe, G.  
307 M., Quinn, P. K., Middlebrook, A. M., Alexander, B., and Brown, S. S.: A large atomic chlorine source inferred  
308 from mid-continental reactive nitrogen chemistry, *Nature.*, 464, 271-274, <https://doi.org/10.1038/nature08905>,



309 2010.

310 Wang, H., Yuan, B., Zheng, E., Zhang, X., Wang, J., Lu, K., Ye, C., Yang, L., Huang, S., Hu, W. J. A. C., and  
311 Physics: Formation and impacts of nitryl chloride in Pearl River Delta, *Atmos. Chem. Phys.*, 22, 14837-14858,  
312 <https://doi.org/10.5194/acp-22-14837-2022>, 2022.

313 Wang, T., Tham, Y. J., Xue, L., Li, Q., Zha, Q., Wang, Z., Poon, S. C. N., Dubé, W. P., Blake, D. R., Louie, P.  
314 K. K., Luk, C. W. Y., Tsui, W., and Brown, S. S.: Observations of nitryl chloride and modeling its source and  
315 effect on ozone in the planetary boundary layer of southern China, *J. Geophys. Res. Atmos.*, 121, 2476-2489,  
316 <https://doi.org/10.1002/2015JD024556>, 2016.

317 Wang, X., Wang, H., Xue, L., Wang, T., Wang, L., Gu, R., Wang, W., Tham, Y. J., Wang, Z., and Yang, L. J.  
318 A. e.: Observations of N<sub>2</sub>O<sub>5</sub> and ClNO<sub>2</sub> at a polluted urban surface site in North China: High N<sub>2</sub>O<sub>5</sub> uptake  
319 coefficients and low ClNO<sub>2</sub> product yields, *Atmos. Environ.*, 156, 125-134,  
320 <http://dx.doi.org/10.1016/j.atmosenv.2017.02.035>, 2017a.

321 Wang, Z., Wang, W., Tham, Y. J., Li, Q., Wang, H., Wen, L., Wang, X., and Wang, T.: Fast heterogeneous N<sub>2</sub>O<sub>5</sub>  
322 uptake and ClNO<sub>2</sub> production in power plant and industrial plumes observed in the nocturnal residual layer  
323 over the North China Plain, *Atmos. Chem. Phys.*, 17, 12361-12378, [https://doi.org/10.5194/acp-17-12361-](https://doi.org/10.5194/acp-17-12361-2017)  
324 [2017](https://doi.org/10.5194/acp-17-12361-2017), 2017b.

325 Xia, M., Peng, X., Wang, W., Yu, C., Wang, Z., Tham, Y. J., Chen, J., Chen, H., Mu, Y., Zhang, C. J. A. C.,  
326 and Physics: Winter ClNO<sub>2</sub> formation in the region of fresh anthropogenic emissions: seasonal variability and  
327 insights into daytime peaks in northern China, *Atmos. Chem. Phys.*, 21, 15985-16000,  
328 <https://doi.org/10.5194/acp-21-15985-2021>, 2021.

329 Xia, M., Peng, X., Wang, W., Yu, C., Sun, P., Li, Y., Liu, Y. A. H. C. t. A.-P. O. A. C., Xu, Z., Wang, Z., Xu,  
330 Z., Nie, W., Ding, A., and Wang, T.: Significant production of ClNO<sub>2</sub> and possible source of Cl<sub>2</sub> from N<sub>2</sub>O<sub>5</sub>  
331 uptake at a suburban site in eastern China, *Atmos. Chem. Phys.*, 20, 6147-6158, [https://doi.org/10.5194/acp-](https://doi.org/10.5194/acp-20-6147-2020)  
332 [20-6147-2020](https://doi.org/10.5194/acp-20-6147-2020), 2020.

333 Xue, L. K., Saunders, S. M., Wang, T., Gao, R., Wang, X. F., Zhang, Q. Z., and Wang, W. X.: Development of  
334 a chlorine chemistry module for the Master Chemical Mechanism, *Geosci. Model Dev.*, 8, 3151-3162,  
335 <https://doi.org/10.5194/gmd-8-3151-2015>, 2015.

336 Yi, X., Sarwar, G., Bian, J., Huang, L., Li, Q., Jiang, S., Liu, H., Wang, Y., Chen, H., and Wang, T. J. J. o. G.  
337 R. A.: Significant Impact of Reactive Chlorine on Complex Air Pollution Over the Yangtze River Delta Region,  
338 China, *J. Geophys. Res. Atmos.*, 128, e2023JD038898, <https://doi.org/10.1029/2023JD038898>, 2023.

339 Yun, H., Wang, T., Wang, W., Tham, Y. J., Li, Q., Wang, Z., and Poon, S. C. N.: Nighttime NO<sub>x</sub> loss and ClNO<sub>2</sub>  
340 formation in the residual layer of a polluted region: Insights from field measurements and an iterative box  
341 model, *Sci. Total Environ.*, 622-623, 727-734, <https://doi.org/10.1016/j.scitotenv.2017.11.352>, 2018.  
342
