# Supplementary material for: Formation drivers and photochemical effects of ClNO 2 in a coastal city of Southeast China
Source: Copernicus journal article supplement (doi:10.5194/egusphere-2024-1638), 2024-07-24
Supplement: Supplementary file [file egusphere-2024-1638-AC1-supplement.pdf]

## Responses to Editors and Reviewers

We appreciate the reviewers for the constructive and helpful comments, the incorporation of which has led to an improved manuscript. We have revised the manuscript appropriately and addressed the reviewer's comments in our point-by-point responses. As detailed below, the reviewer's comments are shown in black, our responses to the comments are in blue fonts, and the added/rewritten parts are presented in red fonts.

**RC1: ['Comment on egusphere-2024-1638'](#), Anonymous Referee #1, 31 Jul 2024**

### General Comments

The work by Gaojie Chen et al. is a well written study presenting two months of ambient observations in Southeast China and has two main components. First, the work introduces interesting evidence for the formation of ClNO<sub>2</sub> during the daytime by a recently suggested particulate nitrate mechanism. Second, the work discusses the implications for Cl radical production from ClNO<sub>2</sub> photolysis.

The first component has significant implications for the understanding of ClNO<sub>2</sub> formation globally. However, a discussion of the traditional metrics of ClNO<sub>2</sub> formation, the N<sub>2</sub>O<sub>5</sub> uptake rate and ClNO<sub>2</sub> yield, are completely absent from the paper. Without a discussion on this topic, the authors' conclusion that "NO<sub>3</sub><sup>-</sup> photolysis contributed to daytime generation" is severely weakened. In fact, it is based only a machine learning output which gauges the "importance" of NO<sub>3</sub><sup>-</sup> influence on ClNO<sub>2</sub> as well as a linear regression of ClNO<sub>2</sub> with NO<sub>3</sub><sup>-</sup> × jNO<sub>2</sub> × aerosol S<sub>a</sub>. In this joint correlation, insufficient evidence is provided to suggest that the photolysis component improves the correlation. As such, I request major revisions in which the authors justify their conclusion by demonstrating that the daytime observations of ClNO<sub>2</sub> cannot be explained by traditional N<sub>2</sub>O<sub>5</sub> and ClNO<sub>2</sub> chemistry.

The second component is based on box modeling from the master chemical mechanism. Aside from a lack of detail on the parametrization used for N<sub>2</sub>O<sub>5</sub> uptake and

CINO<sub>2</sub> yield, the results presented are generally sound and informative. I request that the authors include their choice of parametrization in the main text.

**Response:** Thanks for your valuable comments. Your review comments and suggestions are benefit to improve the quality and readability of this manuscript. We have revised the manuscript appropriately and addressed the reviewer's comments point-by-point for consideration as below.

The first component: We have added the discussions on the N<sub>2</sub>O<sub>5</sub> uptake coefficient ( $\gamma(\text{N}_2\text{O}_5)$ ) and CINO<sub>2</sub> yield ( $\phi(\text{CINO}_2)$ ). Furthermore, we also provided the evidence showing that the daytime observations of CINO<sub>2</sub> cannot be explained by traditional N<sub>2</sub>O<sub>5</sub> and CINO<sub>2</sub> chemistry. Please refer to our response to Specific Comment 4 for more details.

The second component: In this study, the box model is employed to evaluate the photochemical effects of CINO<sub>2</sub>. The levels of CINO<sub>2</sub> in the box model were constrained by the observed levels of CINO<sub>2</sub> from our field measurements. This approach eliminates the necessity for parameterization of N<sub>2</sub>O<sub>5</sub> uptake and CINO<sub>2</sub> yield to determine CINO<sub>2</sub> levels. Therefore, the parametrization for N<sub>2</sub>O<sub>5</sub> uptake and CINO<sub>2</sub> yield was not utilized in the box model.

### **Specific Comments**

1. Section 2: A description on the handling of N<sub>2</sub>O<sub>5</sub> uptake and CINO<sub>2</sub> yield is absent from the methods. A list of previous papers is provided but it is not clear how these two parameters are handled. Both N<sub>2</sub>O<sub>5</sub> uptake and CINO<sub>2</sub> yield will vary with the parameters investigated here (T, RH, etc.). See McDuffie et al.

McDuffie, E. E., Fibiger, D. L., Dubé, W. P., Lopez Hilfiker, F., Lee, B. H., Jaeglé, L., et al. (2018a). CINO<sub>2</sub> yields from aircraft measurements during the 2015 WINTER campaign and critical evaluation of the current parameterization. *Journal of Geophysical Research: Atmospheres*, 123(22), 12994–13015. <https://doi.org/10.1029/2018JD029358>

McDuffie, E. E., Fibiger, D. L., Dubé, W. P., Lopez-Hilfiker, F., Lee, B. H., Thornton, J. A., et al. (2018b). Heterogeneous N<sub>2</sub>O<sub>5</sub> uptake during winter: Aircraft measurements

during the 2015 WINTER campaign and critical evaluation of current parameterizations. Journal of Geophysical Research: Atmospheres, 123(8), 4345–4372. <https://doi.org/10.1002/2018JD028336>

**Response:** Thanks for your comment. In this study, the box model is employed to evaluate the photochemical effects of ClNO<sub>2</sub>. The levels of ClNO<sub>2</sub> in the box model were constrained by observed levels of ClNO<sub>2</sub> from our field measurements. This approach negates the need for parameterization of N<sub>2</sub>O<sub>5</sub> uptake and ClNO<sub>2</sub> yield to determine ClNO<sub>2</sub> levels. Therefore, the parametrization for N<sub>2</sub>O<sub>5</sub> uptake and ClNO<sub>2</sub> yield was not utilized in the box model.

**Added/rewritten:** “Due to the levels of ClNO<sub>2</sub> in the box model determined by observed levels of ClNO<sub>2</sub>, the parametrization for N<sub>2</sub>O<sub>5</sub> uptake and ClNO<sub>2</sub> yield was not utilized in the box model.”

2. Section 3.1: There is no uncertainty presented with the observations in the main text. Please include the uncertainties as the uncertainties in the SI are non-negligible (~20 %).

**Response:** Thanks for your comment. We have included the uncertainties in the main text.

**Added/rewritten:** “The uncertainties of the ClNO<sub>2</sub> and N<sub>2</sub>O<sub>5</sub> measurements were estimated to be ~20 %.”

3. Figure 5: What is the interpretation of negative “importance factors”? During the daytime, N<sub>2</sub>O<sub>5</sub> is a negative importance factor. Please discuss this in the main text.

**Response:** Thanks for your comment. In the XGBoost-SHAP model, SHAP values are used to quantify the contribution of each feature to the prediction values, with a negative SHAP value indicating a negative contribution. Generally, negative “importance factors” suggest that the presence of these factors contributes minimally or decreases the predicted values of the dependent variable. Therefore, in our study, negative SHAP values for N<sub>2</sub>O<sub>5</sub> during the daytime indicate that the contribution of N<sub>2</sub>O<sub>5</sub> chemistry to daytime ClNO<sub>2</sub> levels was limited. We have added these discussions.

**Added/rewritten:** “Generally, negative “importance factors” suggest that the

presence of these factors contributes minimally or decreases the predicted values of the dependent variable. Therefore, in our study, negative SHAP values for  $N_2O_5$  during the daytime indicate that the contribution of  $N_2O_5$  chemistry to daytime  $ClNO_2$  levels was limited.”

4. Section 3.2: A discussion on the changes in aerosol content (particulate nitrate) and the effect on  $N_2O_5$  uptake and  $ClNO_2$  yield is absent. Such a discussion is critical here. Traditionally, one expects nitrate to reduce  $N_2O_5$  uptake (the nitrate effect) which would limit the production of  $ClNO_2$ . Even so,  $ClNO_2$  could be enhanced in a high nitrate case if the  $N_2O_5$  uptake and  $ClNO_2$  yield are substantially greater than low nitrate air masses. According to Figure 1, there are concurrent enhancements of  $pCl$  and  $pNO_3$  during some time periods. As  $pCl$  increases the  $ClNO_2$  yield will also increase which would then be (coincidentally?) concurrent with high  $pNO_3$ . Even more, these periods of concurrent  $pCl$  and  $pNO_3$  appear to correlate with enhanced  $PM_{2.5}$  and thus, I assume, aerosol surface area. Increases in surface area would then increase  $N_2O_5$  uptake further promoting  $ClNO_2$  and  $pNO_3$  production. Lastly, Figure 6 suggests that the correlation between  $ClNO_2$  mixing ratio and  $pNO_3 \times jNO_2 \times Sa$  is driven by  $pNO_3 \times Sa$  while  $jNO_2$  has a limited or no correlation (panel d). In other words, photolysis appears to have a limited role in the production of  $ClNO_2$ .

While the above may be speculative, it is an example of why a lack of discussion on the  $ClNO_2$  yield and  $N_2O_5$  uptake significantly weakens the arguments made by the authors. As written, I believe there is insufficient evidence to conclude that “ $NO_3^-$  photolysis contributed to daytime  $[ClNO_2]$  generation”.

**Response:** Thanks for your valuable comments. The  $N_2O_5$  uptake coefficient ( $\gamma(N_2O_5)$ ) and  $ClNO_2$  yield ( $\phi(ClNO_2)$ ) were estimated using the observational data and parameterization. We derived the values of  $\gamma(N_2O_5)$  and  $\phi(ClNO_2)$  based on increased rates of  $ClNO_2$  and particle nitrate ( $NO_3^-$ ) in the field observation (Phillips et al., 2016). Specially,  $\gamma(N_2O_5)$  and  $\phi(ClNO_2)$  were calculated by Eq. (1) and (2).

$$\gamma(N_2O_5) = \frac{2 \times (P(ClNO_2) + P(NO_3^-))}{cN_2O_5 S_a [N_2O_5]} \quad (1)$$

$$\phi(\text{ClNO}_2) = 2 \times \left( 1 + \frac{P(\text{NO}_3^-)}{P(\text{ClNO}_2)} \right)^{-1} \quad (2)$$

Here,  $P(\text{ClNO}_2)$  and  $P(\text{NO}_3^-)$  represent the production rates of  $\text{ClNO}_2$  and  $\text{NO}_3^-$  induced by  $\text{N}_2\text{O}_5$  uptake, respectively.  $S_a$  denotes the aerosol surface area, and  $c(\text{N}_2\text{O}_5)$  is the mean molecular speed of  $\text{N}_2\text{O}_5$ . This method assumes that air masses remain relatively stable, and  $\text{ClNO}_2$  and  $\text{NO}_3^-$  were produced through nighttime  $\text{N}_2\text{O}_5$  heterogeneous uptake. More details on the method are provided elsewhere (Tham et al., 2018; Niu et al., 2022; Phillips et al., 2016). Using the method and selection criteria, we derived  $\gamma(\text{N}_2\text{O}_5)$  and  $\phi(\text{ClNO}_2)$  during the whole measurement period.

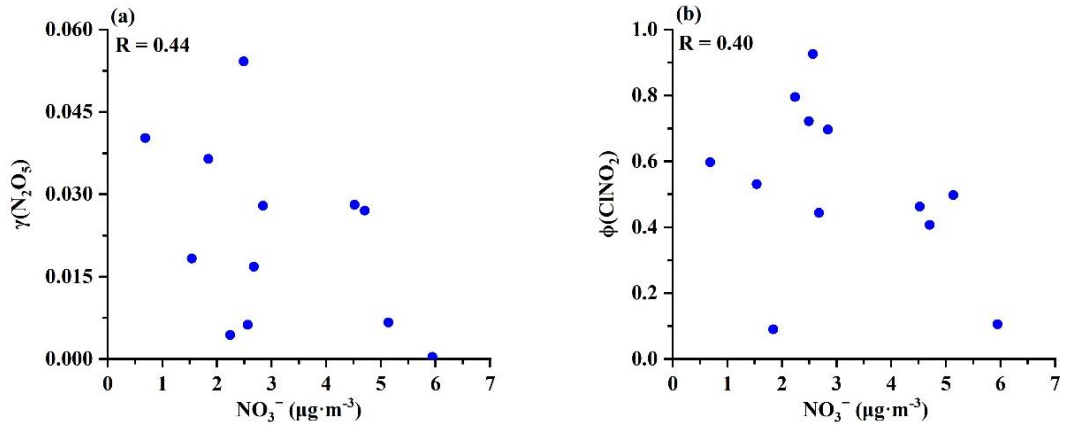

Figure 1. The relationship between field-derived  $\gamma(\text{N}_2\text{O}_5)$  (a),  $\phi(\text{ClNO}_2)$  (b) and  $\text{NO}_3^-$  concentrations.

The relative importance of  $\text{NO}_3^-$  derived from the XGBoost-SHAP result indicated that  $\text{NO}_3^-$  could play a vital role in affecting the concentrations of  $\text{ClNO}_2$  besides  $\text{N}_2\text{O}_5$ . The high  $\text{NO}_3^-$  concentrations ( $> 3.7 \mu\text{g}\cdot\text{m}^{-3}$ ) are accompanied by the elevation of  $\text{ClNO}_2$ , especially its concentrations reaching  $6.2 \mu\text{g}\cdot\text{m}^{-3}$ . Previous studies declared that the increased concentrations of  $\text{NO}_3^-$  decreased  $\gamma(\text{N}_2\text{O}_5)$ , which would limit the production of  $\text{ClNO}_2$  (Wahner et al., 1998; Mentel et al., 1999; Bertram and Thornton, 2009). As depicted in Figure 1, the dependence of  $\gamma(\text{N}_2\text{O}_5)$  on  $\text{NO}_3^-$  concentrations follows the nitrate suppression effect, which subsequently hindered further  $\text{ClNO}_2$  formation. Therefore, the importance of nighttime  $\text{NO}_3^-$  for  $\text{ClNO}_2$  levels is that they are co-products from the processes of  $\text{N}_2\text{O}_5$  heterogeneous uptake. During our field

observation, compared to low  $\text{NO}_3^-$  conditions,  $\text{ClNO}_2$  production was enhanced in high  $\text{NO}_3^-$  conditions. Especially in late autumn, the increased aerosol surface area and  $\text{N}_2\text{O}_5$  levels enhanced  $\text{N}_2\text{O}_5$  uptake, which further promoted both  $\text{ClNO}_2$  and  $\text{NO}_3^-$  production.

To evaluate the contribution of the heterogeneous  $\text{N}_2\text{O}_5$  uptake to daytime  $\text{ClNO}_2$  levels, we calculated  $\text{ClNO}_2$  production using Eq. (3), considering the loss of  $\text{ClNO}_2$  through photolysis. This method has been employed in a previous study (Tham et al., 2016).

$$\frac{d[\text{ClNO}_2]}{dt} = k(\text{N}_2\text{O}_5)[\text{N}_2\text{O}_5]\phi(\text{ClNO}_2) - J\text{ClNO}_2[\text{ClNO}_2] \quad (3)$$

$$k(\text{N}_2\text{O}_5) = \frac{1}{4}c\text{N}_2\text{O}_5S_a\gamma(\text{N}_2\text{O}_5) \quad (4)$$

We used a  $\gamma(\text{N}_2\text{O}_5)$  value of 0.06 and a  $\phi(\text{ClNO}_2)$  value of 1.0 in our calculations, which represented upper-end estimates based on previous field studies (McDuffie et al., 2018a; McDuffie et al., 2018b; Tham et al., 2016). However, as shown in Figure 2, a  $\phi(\text{ClNO}_2)$  of 1.0 with a  $\gamma(\text{N}_2\text{O}_5)$  of 0.06 ( $\phi\gamma = 0.06$ ) fails to reproduce the observed levels of daytime  $\text{ClNO}_2$ . A larger  $\gamma(\text{N}_2\text{O}_5)$  of 0.11 would be necessary, but such high uptake coefficients and yields are not supported by the current literature. Therefore, we believe that the observed daytime  $\text{ClNO}_2$  levels, particularly around noon, cannot be adequately explained by heterogeneous  $\text{N}_2\text{O}_5$  uptake alone, suggesting the presence of additional sources contributing to the formation of daytime  $\text{ClNO}_2$ .

Notably, the laboratory research had confirmed that  $\text{NO}_3^-$  photolysis can produce  $\text{ClNO}_2$  (Dalton et al., 2023). In our study, machine learning analysis, which gauges the “importance” of  $\text{NO}_3^-$  in affecting daytime  $\text{ClNO}_2$ , as well as a linear regression of  $\text{ClNO}_2$  against  $\text{NO}_3^- \times J\text{NO}_2 \times S_a$ , implied that  $\text{NO}_3^-$  photolysis contributed to daytime  $\text{ClNO}_2$  concentrations at our study site. Although  $\text{NO}_3^-$  photolysis can produce  $\text{ClNO}_2$ , this does not necessarily mean that higher photolysis intensity will result in higher  $\text{ClNO}_2$  concentrations. It is crucial to understand the dual role of photolysis intensity in determining daytime  $\text{ClNO}_2$  levels. Photolysis can contribute to the generation of  $\text{ClNO}_2$  by promoting  $\text{NO}_3^-$  photolysis, while also causing the rapid decomposition of  $\text{ClNO}_2$ . As reported in California (Mielke et al., 2013), reduced photolysis rates even

increased daytime ClNO<sub>2</sub> levels by decreasing ClNO<sub>2</sub> loss through photolysis. Additionally, in real atmospheric conditions, several factors beyond photolysis influence NO<sub>3</sub><sup>-</sup> photolysis, including NO<sub>3</sub><sup>-</sup> concentrations and particulate chloride levels.

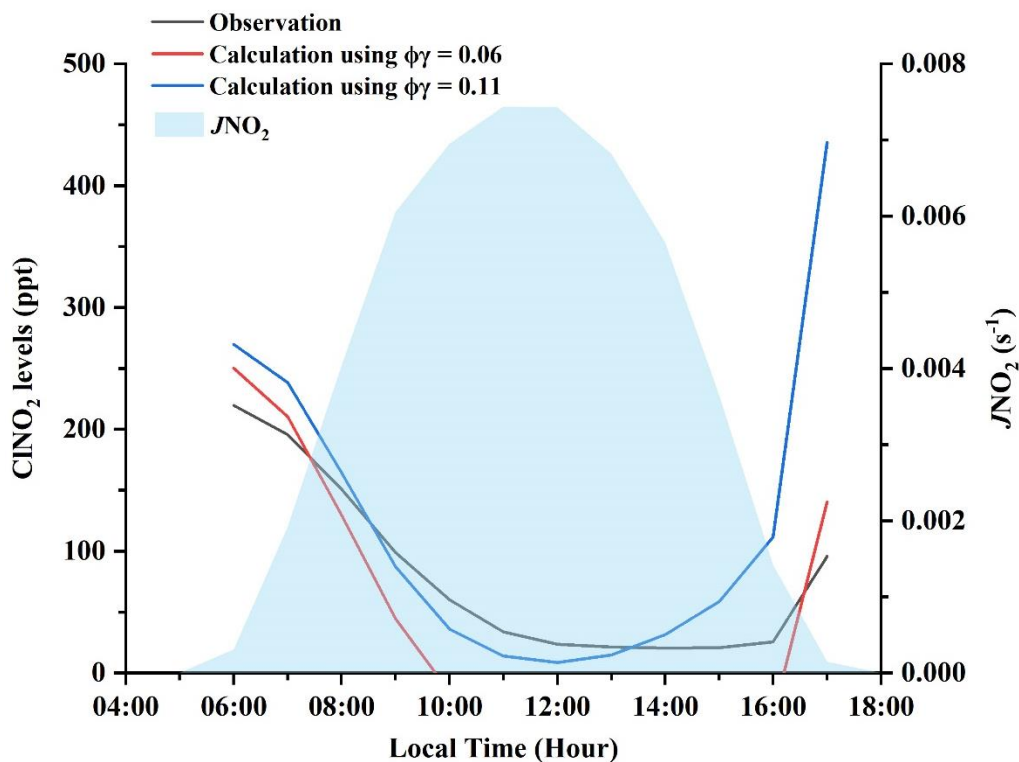

Figure 2. Comparisons of daytime ClNO<sub>2</sub> levels between observation, and calculation using Eq. (4) with a  $\phi(\text{ClNO}_2)$  of 1.0 and a  $\gamma(\text{N}_2\text{O}_5)$  of 0.06 ( $\phi\gamma = 0.06$ ), or a  $\phi(\text{ClNO}_2)$  of 1.0 and a  $\gamma(\text{N}_2\text{O}_5)$  of 0.11 ( $\phi\gamma = 0.11$ ).

**Added/rewritten:** “N<sub>2</sub>O<sub>5</sub> concentrations only presented a small peak after sunset, and declined to near the detection limit in the daytime. Previous studies indicated that abundant ClNO<sub>2</sub> could be transport from upper atmosphere or air mass, which contributed to ClNO<sub>2</sub> concentrations in the early morning (Tham et al., 2016; Xia et al., 2021; Jeong et al., 2019). However, the explanations for the concentrations of ClNO<sub>2</sub> around noon remained elusive. To evaluate the contribution of the heterogeneous N<sub>2</sub>O<sub>5</sub> uptake to daytime ClNO<sub>2</sub> levels, we calculated ClNO<sub>2</sub> production using Eq. (3), considering the loss of ClNO<sub>2</sub> through photolysis. This method has been employed in a previous study (Tham et al., 2016).

We used a  $\gamma(\text{N}_2\text{O}_5)$  value of 0.06 and a  $\phi(\text{ClNO}_2)$  value of 1.0 in our calculations, which represent upper-end estimates based on previous field studies (McDuffie et al., 2018a; McDuffie et al., 2018b; Tham et al., 2016). However, as shown in Figure. 2R, a  $\phi(\text{ClNO}_2)$  of 1.0 with a  $\gamma(\text{N}_2\text{O}_5)$  of 0.06 ( $\phi\gamma = 0.06$ ) fails to reproduce the observed levels of daytime  $\text{ClNO}_2$ . A larger  $\gamma(\text{N}_2\text{O}_5)$  of 0.11 would be necessary, but such high uptake coefficients and yields are not supported by the current literature. Therefore, we believe that the observed daytime  $\text{ClNO}_2$  levels, particularly around noon, cannot be adequately explained by heterogeneous  $\text{N}_2\text{O}_5$  uptake alone, suggesting the presence of additional sources contributing to the formation of daytime  $\text{ClNO}_2$ .”

“The relative importance of  $\text{NO}_3^-$  derived from the XGBoost-SHAP result indicated that  $\text{NO}_3^-$  could play a vital role in affecting the concentrations of  $\text{ClNO}_2$  besides  $\text{N}_2\text{O}_5$ . Moreover, according to Figure. 4b, the high  $\text{NO}_3^-$  concentrations ( $> 3.7 \mu\text{g}\cdot\text{m}^{-3}$ ) are accompanied by the elevation of  $\text{ClNO}_2$ , especially its concentrations reaching  $6.2 \mu\text{g}\cdot\text{m}^{-3}$ . Previous studies declared that increased concentrations of  $\text{NO}_3^-$  decreased  $\gamma(\text{N}_2\text{O}_5)$ , which would limit the production of  $\text{ClNO}_2$  (Wahner et al., 1998; Mentel et al., 1999; Bertram and Thornton, 2009). As depicted in Figure 1, the dependence of  $\gamma(\text{N}_2\text{O}_5)$  on  $\text{NO}_3^-$  concentrations follows the nitrate suppression effect, which subsequently hindered further  $\text{ClNO}_2$  formation. Therefore, the importance of nighttime  $\text{NO}_3^-$  for  $\text{ClNO}_2$  levels is that they are co-products from the processes of  $\text{N}_2\text{O}_5$  heterogeneous uptake. During our field observation, compared to low  $\text{NO}_3^-$  conditions,  $\text{ClNO}_2$  production was enhanced in high  $\text{NO}_3^-$  conditions. Especially in late autumn, the increased aerosol surface area and  $\text{N}_2\text{O}_5$  levels enhanced  $\text{N}_2\text{O}_5$  uptake, which further promoted both  $\text{ClNO}_2$  and  $\text{NO}_3^-$  production.”

“It is crucial to understand the dual role of photolysis intensity in determining daytime  $\text{ClNO}_2$  levels. Photolysis can contribute to the generation of  $\text{ClNO}_2$  by promoting  $\text{NO}_3^-$  photolysis, while also causing the rapid decomposition of  $\text{ClNO}_2$ . As reported in California (Mielke et al., 2013), reduced photolysis rates even increased daytime  $\text{ClNO}_2$  levels by decreasing  $\text{ClNO}_2$  loss through photolysis.”

## Technical Comments



Line 76: tenths: tens

**Response:** Thanks for your comment. We have revised it.

**Added/rewritten:** “Since Osthoff et al. (2008) firstly detected over 1 ppb of ClNO<sub>2</sub> in the urban outflows of America, significant production of ClNO<sub>2</sub> was widely observed in the polluted coastal and inland areas with abundant anthropogenic emissions and chloride sources, and its concentrations were ranged from tens of ppt to several ppb.”

Figure 3, 5 and 6: Please change the color scale to a colorblind friendly version.

**Response:** Thanks for your comment. We have changed the color scale in Figure 3, 5 and 6 to a colorblind friendly version. Additionally, due to N<sub>2</sub>O<sub>5</sub>, NO<sub>3</sub><sup>-</sup>, T, RH, and UV being the most important features of affecting ClNO<sub>2</sub> concentrations, we only compared their relative importance. Therefore, Figure 5 only presents the relative importance of N<sub>2</sub>O<sub>5</sub>, NO<sub>3</sub><sup>-</sup>, T, RH, and UV.

**Added/rewritten:**

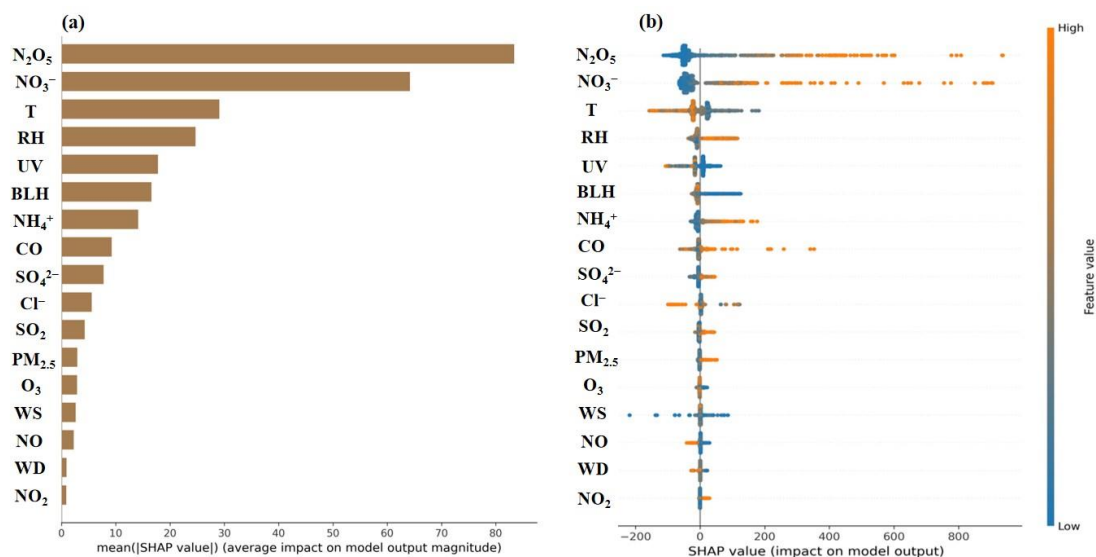

Figure 3. Relative importance of each feature to ClNO<sub>2</sub> using XGBoost-SHAP during the autumn observation period. The mean absolute SHAP value (a), summary plot of SHAP values of each feature (b).

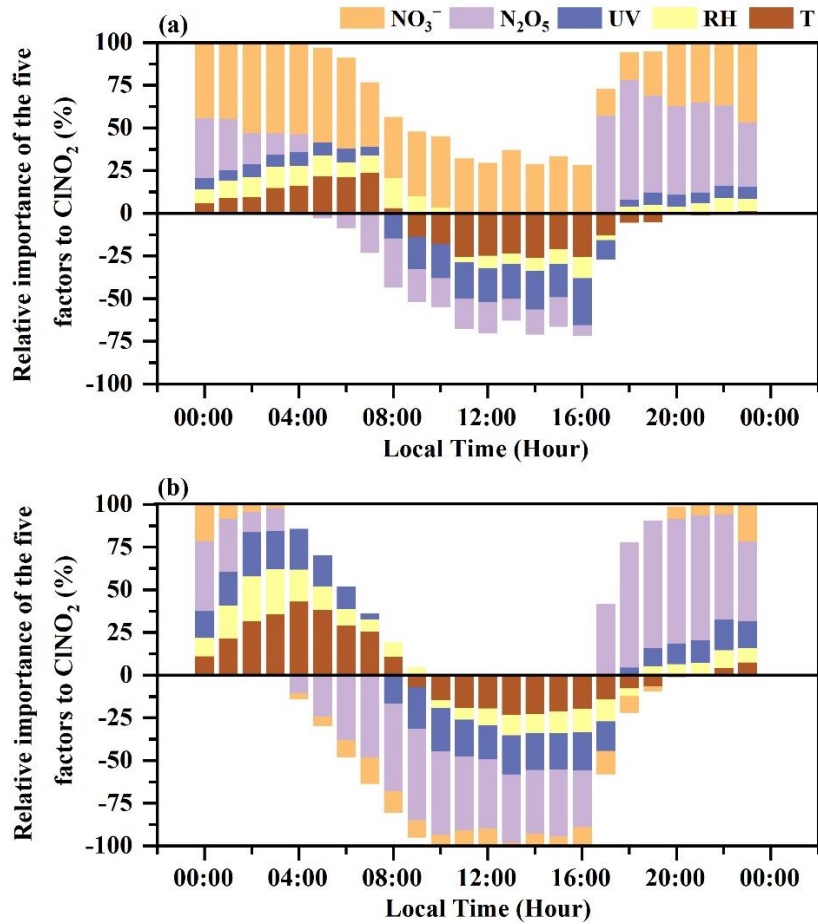

Figure 5. The diurnal variations of the relative importance of the major five factors (including  $\text{N}_2\text{O}_5$ ,  $\text{NO}_3^-$ , T, RH, and UV) to  $\text{ClNO}_2$  based on the SHAP values under the high ( $> 3.7 \mu\text{g}\cdot\text{m}^{-3}$ ) (a) and low ( $< 3.7 \mu\text{g}\cdot\text{m}^{-3}$ ) (b)  $\text{ClNO}_2$  concentrations.

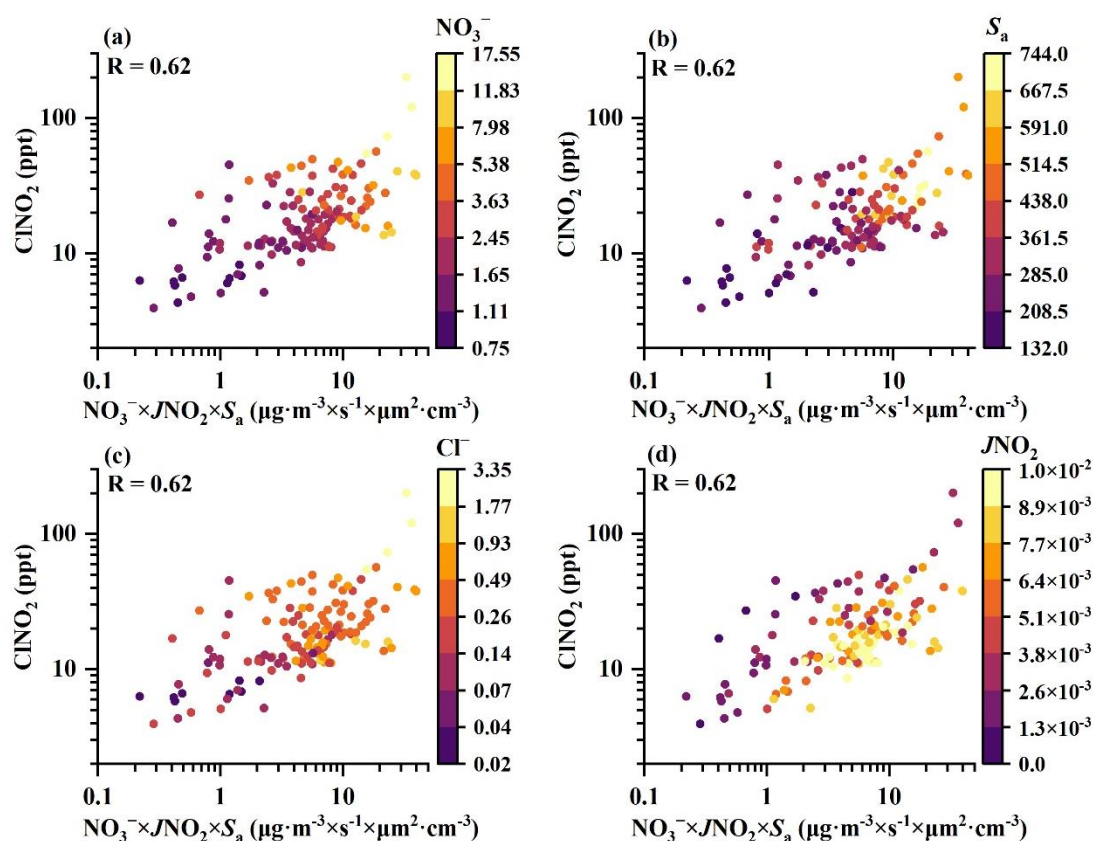

Figure 6. The relationship of daytime ClNO<sub>2</sub> concentrations (12:00-15:00 Local Time) and a proxy of nitrate (NO<sub>3</sub><sup>-</sup>) photolysis (NO<sub>3</sub><sup>-</sup> × JNO<sub>2</sub> × S<sub>a</sub>). The color of the dots denotes the NO<sub>3</sub><sup>-</sup> (a), S<sub>a</sub> (b), Cl<sup>-</sup> (c), JNO<sub>2</sub> (d), respectively.

Line 215: averagely: average

**Response:** Thanks for your comment. We have corrected it.

**Added/rewritten:** “Therefore, the average daily concentrations of NO<sub>3</sub><sup>-</sup> were classified as high (> 3.7 µg·m<sup>-3</sup>) and low (< 3.7 µg·m<sup>-3</sup>) NO<sub>3</sub><sup>-</sup> cases to further elucidate the impacts of NO<sub>3</sub><sup>-</sup> on the formation of ClNO<sub>2</sub>.”

Line 224: corrected: correlated

**Response:** Thanks for your comment. We have revised it.

**Added/rewritten:** “As depicted in Figure 6, it is observed that daytime ClNO<sub>2</sub> concentrations correlated well (R = 0.62) with the product of a proxy of NO<sub>3</sub><sup>-</sup> photolysis (NO<sub>3</sub><sup>-</sup> × JNO<sub>2</sub> × S<sub>a</sub>) on aerosol surfaces (S<sub>a</sub>), implying that the photolysis of NO<sub>3</sub><sup>-</sup> contributed to the daytime concentrations of ClNO<sub>2</sub> at our study site.”

## References

- Bertram, T. and Thornton, J.: Toward a general parameterization of N<sub>2</sub>O<sub>5</sub> reactivity on aqueous particles: the competing effects of particle liquid water, nitrate and chloride, *Atmos. Chem. Phys.*, 9, 8351-8363, <https://doi.org/10.5194/acp-9-8351-2009>, 2009.
- Dalton, E. Z., Hoffmann, E. H., Schaefer, T., Tilgner, A., Herrmann, H., and Raff, J. D.: Daytime Atmospheric Halogen Cycling through Aqueous-Phase Oxygen Atom Chemistry, *J. Am. Chem. Soc.*, 145, 15652-15657, <https://doi.org/10.1021/jacs.3c03112>, 2023.
- Jeong, D., Seco, R., Gu, D., Lee, Y., Nault, B. A., Knote, C. J., McGee, T., Sullivan, J. T., Jimenez, J. L., Campuzano-Jost, P., Blake, D. R., Sanchez, D., Guenther, A. B., Tanner, D., Huey, L. G., Long, R., Anderson, B. E., Hall, S. R., Ullmann, K., Shin, H., Herndon, S. C., Lee, Y., Kim, D., Ahn, J., and Kim, S.: Integration of airborne and ground observations of nitryl chloride in the Seoul metropolitan area and the implications on regional oxidation capacity during KORUS-AQ 2016, *Atmos. Chem. Phys.*, 19, 12779-12795, <https://doi.org/10.5194/acp-19-12779-2019>, 2019.
- McDuffie, E. E., Fibiger, D. L., Dubé, W. P., Lopez Hilfiker, F., Lee, B. H., Jaeglé, L., Guo, H., Weber, R. J., Reeves, J. M., Weinheimer, A. J., Schroder, J. C., Campuzano-Jost, P., Jimenez, J. L., Dibb, J. E., Veres, P., Ebben, C., Sparks, T. L., Wooldridge, P. J., Cohen, R. C., Campos, T., Hall, S. R., Ullmann, K., Roberts, J. M., Thornton, J. A., and Brown, S. S.: ClNO<sub>2</sub> Yields From Aircraft Measurements During the 2015 WINTER Campaign and Critical Evaluation of the Current

- Parameterization, *J. Geophys. Res. Atmos.*, 123, 12,994-913,015, <https://doi.org/10.1029/2018JD029358>, 2018a.
- McDuffie, E. E., Fibiger, D. L., Dubé, W. P., Lopez-Hilfiker, F., Lee, B. H., Thornton, J. A., Shah, V., Jaeglé, L., Guo, H., Weber, R. J., Michael Reeves, J., Weinheimer, A. J., Schroder, J. C., Campuzano-Jost, P., Jimenez, J. L., Dibb, J. E., Veres, P., Ebben, C., Sparks, T. L., Wooldridge, P. J., Cohen, R. C., Hornbrook, R. S., Apel, E. C., Campos, T., Hall, S. R., Ullmann, K., and Brown, S. S.: Heterogeneous N<sub>2</sub>O<sub>5</sub> Uptake During Winter: Aircraft Measurements During the 2015 WINTER Campaign and Critical Evaluation of Current Parameterizations, *J. Geophys. Res. Atmos.*, 123, 4345-4372, <https://doi.org/10.1002/2018JD028336>, 2018b.
- Mentel, T. F., Sohn, M., and Wahner, A. J. P. C. P.: Nitrate effect in the heterogeneous hydrolysis of dinitrogen pentoxide on aqueous aerosols, *Phys. Chem. Chem. Phys.*, 1, 5451-5457, <https://doi.org/10.1039/A905338g>, 1999.
- Mielke, L. H., Stutz, J., Tsai, C., Hurlock, S. C., Roberts, J. M., Veres, P. R., Froyd, K. D., Hayes, P. L., Cubison, M. J., Jimenez, J. L., Washenfelder, R. A., Young, C. J., Gilman, J. B., Gouw, J. A., Flynn, J. H., Grossberg, N., Lefer, B. L., Liu, J., Weber, R. J., and Osthoff, H. D.: Heterogeneous formation of nitryl chloride and its role as a nocturnal NO<sub>x</sub> reservoir species during CalNex-LA 2010, *J. Geophys. Res. Atmos.*, 118, 10,638-610,652, <https://doi.org/10.1002/jgrd.50783>, 2013.
- Niu, Y.-B., Zhu, B., He, L.-Y., Wang, Z., Lin, X.-Y., Tang, M.-X., and Huang, X.-F.: Fast Nocturnal Heterogeneous Chemistry in a Coastal Background Atmosphere and Its Implications for Daytime Photochemistry, *J. Geophys. Res. Atmos.*, 127,

e2022JD036716, <https://doi.org/10.1029/2022JD036716>, 2022.

Phillips, G. J., Thieser, J., Tang, M., Sobanski, N., Schuster, G., Fachinger, J., Drewnick, F., Borrmann, S., Bingemer, H., Lelieveld, J., and Crowley, J. N.: Estimating N<sub>2</sub>O<sub>5</sub> uptake coefficients using ambient measurements of NO<sub>3</sub>, N<sub>2</sub>O<sub>5</sub>, ClNO<sub>2</sub> and particle-phase nitrate, *Atmos. Chem. Phys.*, 16, 13231-13249, <https://doi.org/10.5194/acp-16-13231-2016>, 2016.

Tham, Y. J., Wang, Z., Li, Q., Wang, W., Wang, X., Lu, K., Ma, N., Yan, C., Kecorius, S., Wiedensohler, A., Zhang, Y., and Wang, T.: Heterogeneous N<sub>2</sub>O<sub>5</sub> uptake coefficient and production yield of ClNO<sub>2</sub> in polluted northern China: roles of aerosol water content and chemical composition, *Atmos. Chem. Phys.*, 18, 13155-13171, <https://doi.org/10.5194/acp-18-13155-2018>, 2018.

Tham, Y. J., Wang, Z., Li, Q., Yun, H., Wang, W., Wang, X., Xue, L., Lu, K., Ma, N., Bohn, B., Li, X., Kecorius, S., Größ, J., Shao, M., Wiedensohler, A., Zhang, Y., and Wang, T.: Significant concentrations of nitryl chloride sustained in the morning: investigations of the causes and impacts on ozone production in a polluted region of northern China, *Atmos. Chem. Phys.*, 16, 14959-14977, <https://doi.org/10.5194/acp-16-14959-2016>, 2016.

Wahner, A., Mentel, T. F., Sohn, M., and Stier, J.: Heterogeneous reaction of N<sub>2</sub>O<sub>5</sub> on sodium nitrate aerosol, *J. Geophys. Res. Atmos.*, 103, 31103-31112, <https://doi.org/10.1029/1998JD100022>, 1998.

Xia, M., Peng, X., Wang, W., Yu, C., Wang, Z., Tham, Y. J., Chen, J., Chen, H., Mu, Y., and Zhang, C.: Winter ClNO<sub>2</sub> formation in the region of fresh anthropogenic

emissions: seasonal variability and insights into daytime peaks in northern China,  
Atmos. Chem. Phys., 21, 15985-16000, [https://doi.org/10.5194/acp-21-15985-](https://doi.org/10.5194/acp-21-15985-2021)  
[2021](https://doi.org/10.5194/acp-21-15985-2021), 2021.
