# Supplementary material for: Formation drivers and photochemical effects of ClNO 2 in a coastal city of Southeast China
Source: Copernicus journal article supplement (doi:10.5194/egusphere-2024-1638), 2024-07-24
Supplement: Supplementary file [file egusphere-2024-1638-AC2-supplement.pdf]

## Responses to Editors and Reviewers

We sincerely appreciate the reviewers for their constructive and insightful comments, which are of great benefit to improve the quality of the manuscript. In response, we have carefully revised the manuscript and addressed each comment in a point-by-point manner. For clarity, the reviewers' comments are presented in black, our responses in blue, and the added or revised sections of the manuscript are highlighted in red.

**RC2:** '[Comment on egusphere-2024-1638](#)', Anonymous Referee #3, 03 Jan 2025

In this manuscript, the authors present a study that investigates key factors driving the production of ClNO<sub>2</sub> based on field observations and XGBoost-SHAP model. Furthermore, the authors evaluated the potential impact of ClNO<sub>2</sub> photolysis on the formation of RO<sub>2</sub> and hence, the atmospheric oxidative capacity.

Overall, I found this manuscript interesting and well-constructed. Although the conclusion drawn for the nighttime ClNO<sub>2</sub> formation has been well recognized for two decades, the contribution of NO<sub>3</sub><sup>-</sup> photolysis to daytime ClNO<sub>2</sub> is confirmed by the authors, which brings sufficient novelty to this manuscript.

Despite this, I do have some comments, particularly on the interpretation of the machine learning results, which need to be fully addressed before this manuscript can be accepted for publication.

**Response:** Thank you for your valuable and thoughtful comments. Your comments and suggestions have greatly enhanced the overall quality and readability of the manuscript. We have made the necessary revisions and provided detailed responses to each point below for your consideration.

### General comments:

1. Machine learning, especially SHAP value, starts to be widely used in atmospheric research very recently, but many readers may not be sufficiently familiar with it. To improve the readability, I believe the way of interpreting SHAP values must be fully informed in the manuscript. E.g., what do the negative and positive SHAP values

stand for? Should the contribution be evaluated by the true value or absolute value.

**Response:** Thank you for your comment. We have added a detailed introduction to SHAP values in the revised manuscript.

**Added/rewritten:** “The SHAP model is an interpretability tool designed to analyze the contributions of individual features to model predictions. It employs an additive explanatory framework that considers all features as contributors, drawing inspiration from cooperative game theory. For each predicted instance, SHAP assigns a Shapley value, representing the cumulative contribution of each feature. Positive SHAP values indicate that a feature increases the model’s predicted outcome, signifying a positive contribution. Conversely, negative SHAP values suggest that the feature reduces the predicted value, reflecting a negative contribution. The absolute value of the SHAP score reflects the magnitude of the contribution, regardless of direction, offering insight into the overall importance of the feature. The true value, on the other hand, reveals the direction of the contribution (positive or negative), facilitating a clearer understanding of the relationship between the feature and the prediction.”

2. I am not fully convinced by the way of performing SHAP model and its interpretation.

1) why does the aerosol surface, as a known important factor for  $\text{N}_2\text{O}_5$  uptake, not used as an input of SHAP model?

**Response:** Thank you for your valuable comment. We agree that aerosol surface area is a crucial factor influencing the heterogeneous uptake of  $\text{N}_2\text{O}_5$ . Initially, we had included particle surface area concentrations ( $S_a$ ) in the XGBoost-SHAP model to assess its significance in  $\text{ClNO}_2$  formation. However, the results indicated that  $S_a$  did not play a prominent role (Figure R1). Furthermore, it is found that  $R^2$  values of the training and testing sets slightly improved from 0.963 and 0.861 to 0.965 and 0.891, respectively, when  $S_a$  was not used as an input of a machine learning model. Given that  $\text{PM}_{2.5}$  and its inorganic compositions serve as representative indicators of aerosol conditions to some extent, we chose not to include aerosol surface area as a dependent variable in the machine learning model

to avoid redundancy.

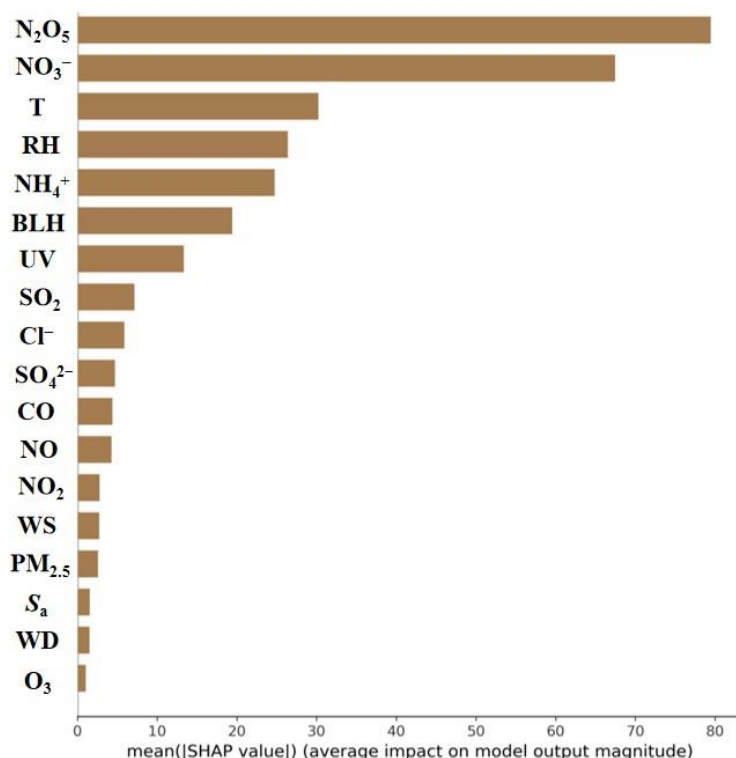

Figure R1. Relative importance of each feature to ClNO<sub>2</sub> using the XGBoost-SHAP model during the autumn observation period, with S<sub>a</sub> included as an additional variable in the model.

- 2) ClNO<sub>2</sub> has a rather long nighttime lifetime, which means ClNO<sub>2</sub> could be accumulated during air mass transport. Meanwhile, N<sub>2</sub>O<sub>5</sub> could both form and loss through the transport, leading to varying patterns of its concentration. In fact, this can be testified by calculating the maximal ClNO<sub>2</sub> production through N<sub>2</sub>O<sub>5</sub> uptake by, e.g., assuming  $\gamma = 0.1$  and ClNO<sub>2</sub> yield = 1. Given this assumption, I didn't see any model input that could represent the influence of air mass transport. I suggest to reconsider their model input and incorporate certain transport parameters.

**Response:** Thank you for your thoughtful comment. I fully agree with your opinion that ClNO<sub>2</sub> tends to accumulate at night. We had indeed considered the impact of air mass transport in our analysis. In this study, trace gases (SO<sub>2</sub>, CO, NO<sub>2</sub>, NO, O<sub>3</sub>, and N<sub>2</sub>O<sub>5</sub>), PM<sub>2.5</sub> and its inorganic compositions (NO<sub>3</sub><sup>-</sup>, SO<sub>4</sub><sup>2-</sup>, NH<sub>4</sub><sup>+</sup>, and Cl<sup>-</sup>), along with meteorological parameters (T, RH, UV, WS, WD, and BLH)

were selected as independent variables. Typically, WS and WD effectively reflect the influence of air masses and play a significant role in the transport, dispersion, and accumulation of atmospheric pollutants. However, results from the XGBoost-SHAP model indicate that WS and WD have a minimal impact on ClNO<sub>2</sub> concentrations (Figure R2). Notably, previous observations indicating that ClNO<sub>2</sub> is easily influenced by air mass transport were primarily conducted in clean rural areas or under background atmospheric conditions (Niu et al., 2022; Tan et al., 2022). Given that our study site located in a typical urban area surrounded by shopping malls, residential zones, and major traffic arteries, it is highly affected by fresh anthropogenic emissions. Therefore, these results suggest that ClNO<sub>2</sub> concentrations are primarily driven by local processes, rather than by air mass transport during our study period.

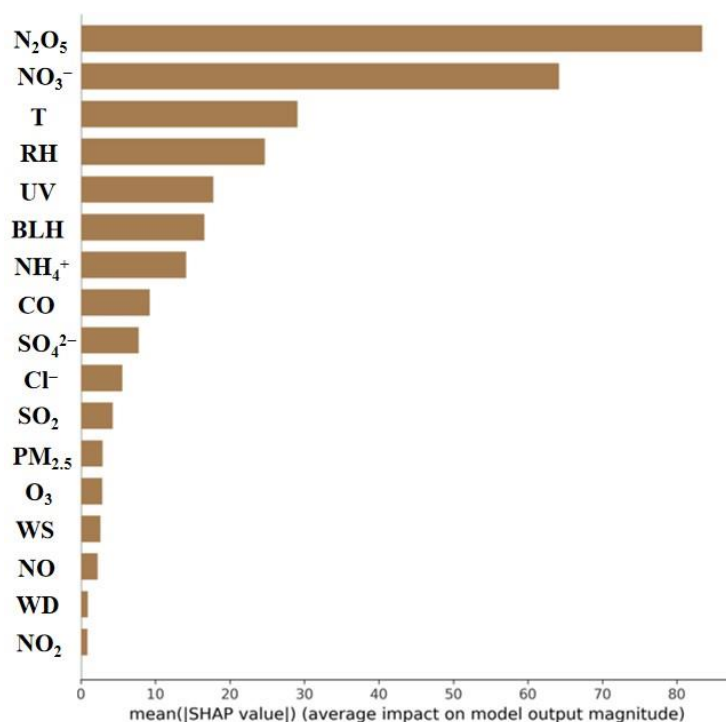

Figure R2. Relative importance of each feature to ClNO<sub>2</sub> using the XGBoost-SHAP model during the autumn observation period.

3) As this study suggested, daytime and nighttime ClNO<sub>2</sub> are driven by different processes, which however, were affected by similar parameters (in different ways). For instance, NO<sub>3</sub><sup>-</sup> is a co-product with ClNO<sub>2</sub> at nighttime, but a precursor of

CINO<sub>2</sub> in the daytime. I suggest to consider conducting SHAP models daytime and nighttime data sets separately, so that the exact role of these parameters can be better revealed.

**Response:** Thanks for your constructive comment. We fully agree with your insightful perspective. Through our in-depth analysis, we found that CINO<sub>2</sub> exhibits distinctly different influence pathways during the daytime and nighttime, with certain parameters potentially playing different roles in these two periods. To investigate this further, we integrated all daytime and nighttime data into a unified machine learning model, resulting in a high-performing model. Using SHAP analysis, we were able to effectively distinguish the roles of key influencing factors between daytime and nighttime.

While the primary formation mechanisms of CINO<sub>2</sub> differ between daytime and nighttime, there is a clear interconnection between daytime and nighttime CINO<sub>2</sub> concentrations. Especially, the elevated nighttime CINO<sub>2</sub> concentrations can significantly affect its concentrations in the early morning. Machine learning models trained exclusively on daytime data show poor performance, with R<sup>2</sup> values for the testing sets dropping below 0.6, thereby constraining further analysis of factor importance. As a result, separating daytime and nighttime data for independent machine learning analyses may risk overlooking the intrinsic linkages between these periods.

We believe that a comprehensive analysis, incorporating both daytime and nighttime data, is crucial for a complete and accurate assessment of CINO<sub>2</sub> production and loss processes. Although we did not segregate the data into daytime and nighttime subsets for machine learning, SHAP analysis enabled us to clearly identify the relative importance of various factors during the daytime and nighttime, providing deeper insights into their respective mechanisms across these two periods.

For example, we used SHAP analysis to evaluate the key influencing factors of daytime CINO<sub>2</sub>. The simulated concentrations of CINO<sub>2</sub>, based on the XGBoost-SHAP model, were significantly elevated when NO<sub>3</sub><sup>-</sup> concentrations were higher than 3.7 μg·m<sup>-3</sup>. Consequently, the average daily concentrations of NO<sub>3</sub><sup>-</sup> were classified as high (> 3.7 μg·m<sup>-3</sup>) and low (< 3.7 μg·m<sup>-3</sup>) to further elucidate the impacts of NO<sub>3</sub><sup>-</sup> on the

formation of ClNO<sub>2</sub>. Fig. R3 presents the diurnal variations in the relative importance of the most critical influencing factors based on the SHAP values under high and low NO<sub>3</sub><sup>-</sup> concentrations. Unexpectedly, daytime NO<sub>3</sub><sup>-</sup> was the dominant influencing factors for daytime ClNO<sub>2</sub> (Fig. R3a). High concentrations of daytime NO<sub>3</sub><sup>-</sup> positively affected the daytime concentrations of ClNO<sub>2</sub>, independent of N<sub>2</sub>O<sub>5</sub> uptake processes. As depicted in Fig. R3a, daytime N<sub>2</sub>O<sub>5</sub> did not promote the elevation of daytime ClNO<sub>2</sub>. Negative SHAP values for N<sub>2</sub>O<sub>5</sub> during the daytime indicate that the contribution of N<sub>2</sub>O<sub>5</sub> chemistry to daytime ClNO<sub>2</sub> levels was limited. Therefore, it is very likely that high concentrations of daytime NO<sub>3</sub><sup>-</sup> participated in daytime ClNO<sub>2</sub> production.

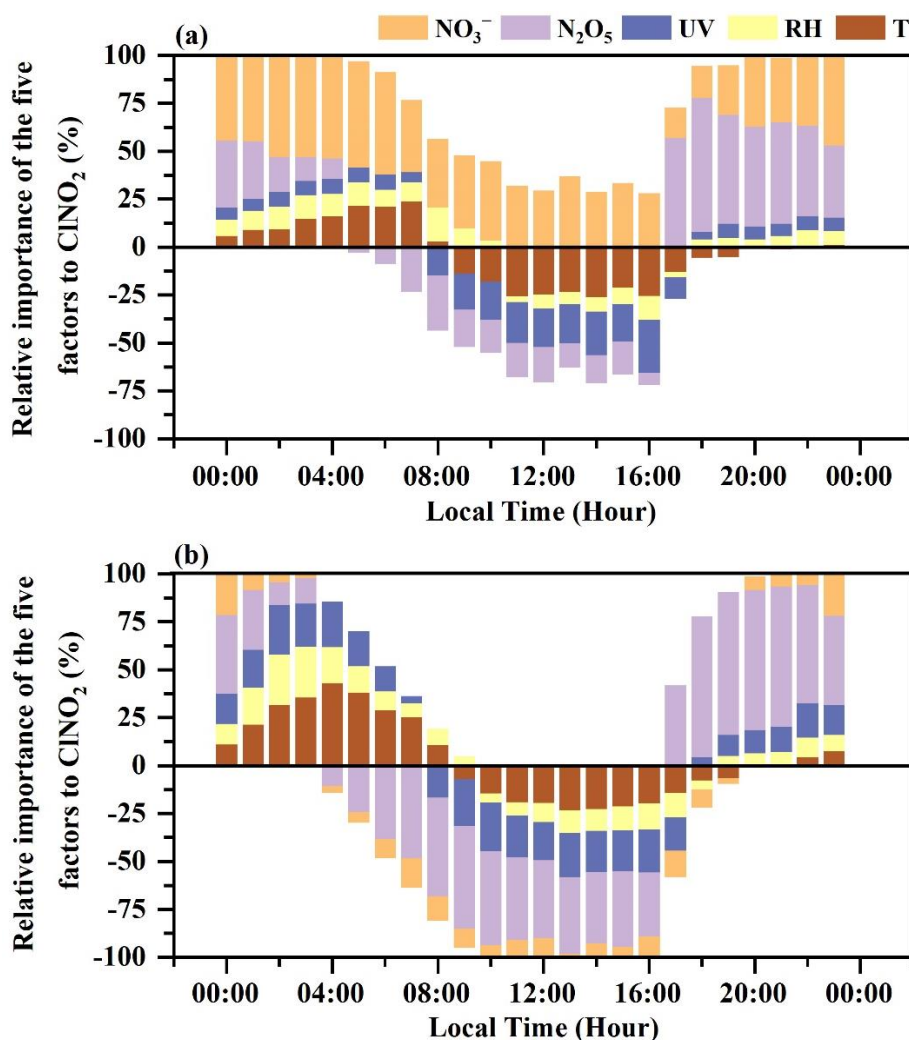

Figure R3. The diurnal variations of the relative importance of factors to ClNO<sub>2</sub> based on the SHAP values under the high (> 3.7 µg·m<sup>-3</sup>) (a) and low (< 3.7 µg·m<sup>-3</sup>) (b) ClNO<sub>2</sub> concentrations.

**Detailed comments:**

Line 64 “were” could be replaced by “are”, as this is common case.

**Response:** Thanks for your comment. We have revised it.

**Added/rewritten:** “The reaction rates between Cl radical and some alkanes are several orders of magnitude faster than those involving OH radical.”

Line 99-100 “our research integrated....” This sentence has grammatic error, please rephrase.

**Response:** Thanks for your comment. This sentence has been rephrased.

**Added/rewritten:** “Field observations, combined with a machine learning model, were used to reveal the key driving factors of ClNO<sub>2</sub> formation. Furthermore, we further investigated the potential mechanisms driving daytime ClNO<sub>2</sub> generation.”

Line 141-143. The statement of *J*ClNO<sub>2</sub> calculation is not clear, please consider to rephrase.

**Response:** Thanks for your comment. The statement of *J*ClNO<sub>2</sub> calculation has been rephrased.

**Added/rewritten:** “The Tropospheric Ultraviolet and Visible Radiation (TUV) model was used to calculate ClNO<sub>2</sub> photolysis rates (*J*ClNO<sub>2</sub>) under clear-sky conditions. The simulated *J*ClNO<sub>2</sub> values were then scaled based on field-measured *J*NO<sub>2</sub> values.”

Line 167-168 “Simultaneously, ...” I think the high correlation between ClNO<sub>2</sub> and N<sub>2</sub>O<sub>5</sub> (and NO<sub>3</sub><sup>-</sup>) does not mean simultaneous peaking. From Fig.1, I can clearly see that their concentrations do not reach the maxima at exactly the same time.

**Response:** Thanks for your valuable comment. We agree with your opinion that the concentrations of ClNO<sub>2</sub>, N<sub>2</sub>O<sub>5</sub>, and NO<sub>3</sub><sup>-</sup> did not reach their maxima simultaneously. We intended to convey that their peak concentrations were observed during the night of November 27th. The sentences have been revised accordingly.

**Added/rewritten:** “The highest concentrations of ClNO<sub>2</sub> were detected during the night of November 27th, with a maximum hourly average of 3.4 ppb. Peak concentrations of N<sub>2</sub>O<sub>5</sub> and NO<sub>3</sub><sup>-</sup> were also observed on that night.”

Line 203-204 the authors first indicate NO<sub>3</sub><sup>-</sup> could affect the formation of ClNO<sub>2</sub>; but afterwards, the authors say that the high NO<sub>3</sub><sup>-</sup> and ClNO<sub>2</sub> together were caused by the simultaneous formation. Please improve the logic of this part.

**Response:** Thanks for your comment. We have improved the logic of this part.

**Added/rewritten:** “Differently, the relative importance of NO<sub>3</sub><sup>-</sup> derived from the XGBoost-SHAP result indicated that elevated ClNO<sub>2</sub> concentrations were associated with high concentrations of NO<sub>3</sub><sup>-</sup> besides N<sub>2</sub>O<sub>5</sub>. According to Fig. 5b, high NO<sub>3</sub><sup>-</sup> concentrations (> 3.7 μg·m<sup>-3</sup>) are accompanied by the elevation of ClNO<sub>2</sub>, especially its concentrations reaching 6.2 μg·m<sup>-3</sup>. The importance of nighttime NO<sub>3</sub><sup>-</sup> for ClNO<sub>2</sub> levels is that they are co-products from the processes of N<sub>2</sub>O<sub>5</sub> heterogeneous uptake. As shown in Fig. 1, compared to low NO<sub>3</sub><sup>-</sup> conditions, ClNO<sub>2</sub> production was enhanced in high NO<sub>3</sub><sup>-</sup> conditions.”

Line 221 “did not promoted...” should be “did not promote”.

**Response:** Thanks for your comment. We have revised it.

**Added/rewritten:** “As depicted in Fig. 5a, daytime N<sub>2</sub>O<sub>5</sub> did not promote the elevation of daytime ClNO<sub>2</sub>.”

Line 222 “A recent study declared that...”. Please use “suggested” or “argued” instead of “declared”.

**Response:** Thanks for your comment. We have revised it.

**Added/rewritten:** “A recent study suggested that nitrate photolysis produced ClNO<sub>2</sub> in addition to Cl<sub>2</sub> (Dalton et al., 2023), while it has been not verified by field observations.”

Line 236-237. I am not convinced by the discussion about the role of temperature. The



authors suggested that  $\text{N}_2\text{O}_5$  is not important for  $\text{ClNO}_2$  in the daytime. Then how can temperature affect  $\text{ClNO}_2$  through the thermal equilibrium of  $\text{N}_2\text{O}_5$ ? Also,  $\text{N}_2\text{O}_5$  is a measured quantity. Such a temperature impact should be already reflected by the connection between daytime  $\text{N}_2\text{O}_5$  and  $\text{ClNO}_2$ .

**Response:** Thank you for your comments. We believe that  $\text{N}_2\text{O}_5$  plays a critical role in the formation of  $\text{ClNO}_2$ , as  $\text{ClNO}_2$  is generated through the heterogeneous uptake of  $\text{N}_2\text{O}_5$  on chloride-containing aerosols. In this study, we emphasized that limited contribution of heterogeneous  $\text{N}_2\text{O}_5$  uptake to daytime  $\text{ClNO}_2$  concentrations was primarily due to very low daytime  $\text{N}_2\text{O}_5$  levels, which are largely associated with its thermal decomposition. In other words, the thermal decomposition process affects  $\text{ClNO}_2$  generation by reducing the availability of  $\text{N}_2\text{O}_5$  in the daytime. Specifically, the elevated ambient temperature from nighttime to daytime reduced  $\text{N}_2\text{O}_5$  concentrations through enhanced thermal decomposition. During the entire observation period from October to November, the overall drop in ambient temperature facilitated  $\text{ClNO}_2$  production by reducing the thermal decomposition of  $\text{N}_2\text{O}_5$ , thereby increasing its availability for heterogeneous uptake.

**Added/rewritten:** “The impact of ambient temperature on  $\text{ClNO}_2$  was probably reflected in its thermal equilibrium with  $\text{N}_2\text{O}_5$ . Elevated daytime ambient temperature suppressed the formation of  $\text{N}_2\text{O}_5$ , resulting in low  $\text{N}_2\text{O}_5$  concentrations, which further limited the contribution of heterogeneous  $\text{N}_2\text{O}_5$  uptake to daytime  $\text{ClNO}_2$  generation. During the whole observation period from October to November, the drop in ambient temperature facilitated  $\text{ClNO}_2$  production by decreasing the thermal decomposition process.”

Line 243 I suggest the subtitle of “Impact of  $\text{ClNO}_2$  photolysis on  $\text{RO}_x$  budget”

**Response:** Thanks for your suggestion. We have revised it.

**Added/rewritten:** “3.3 Impact of  $\text{ClNO}_2$  photolysis on  $\text{RO}_x$  budget.”

Figure 2: the  $\text{N}_2\text{O}_5$  in the lowest panel is barely seen. Please consider to show the pattern by perhaps  $\text{N}_2\text{O}_5 \times 5$ .

**Response:** Thank you for your suggestion. We have revised Figure 2 to update the presentation of  $N_2O_5$  accordingly.

**Added/rewritten:**

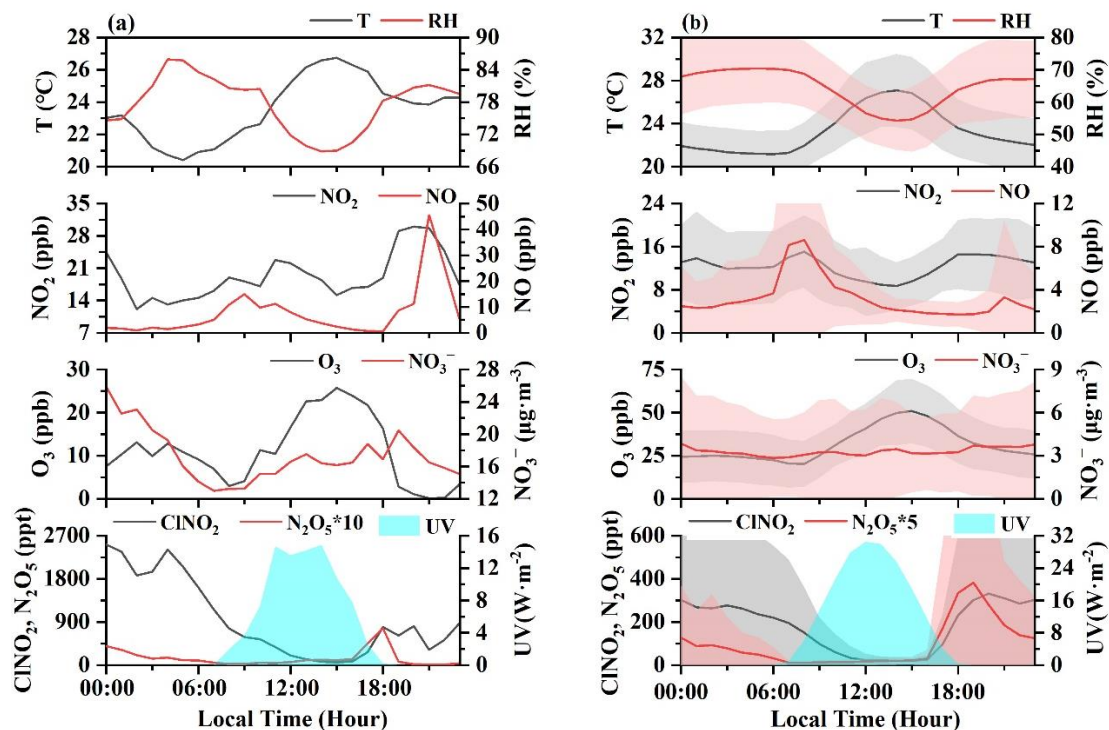

Figure 2. Diurnal variations of  $CINO_2$  and other related parameters for the highest concentrations of  $CINO_2$  (case) on November 28th (a) and the observation-average condition (from 9 October to 5 December) (b).

Figure 4. the division of x ticks looks strange. Please modify.

**Response:** Thanks for your comment. We have modified Figure 4.

**Added/rewritten:**

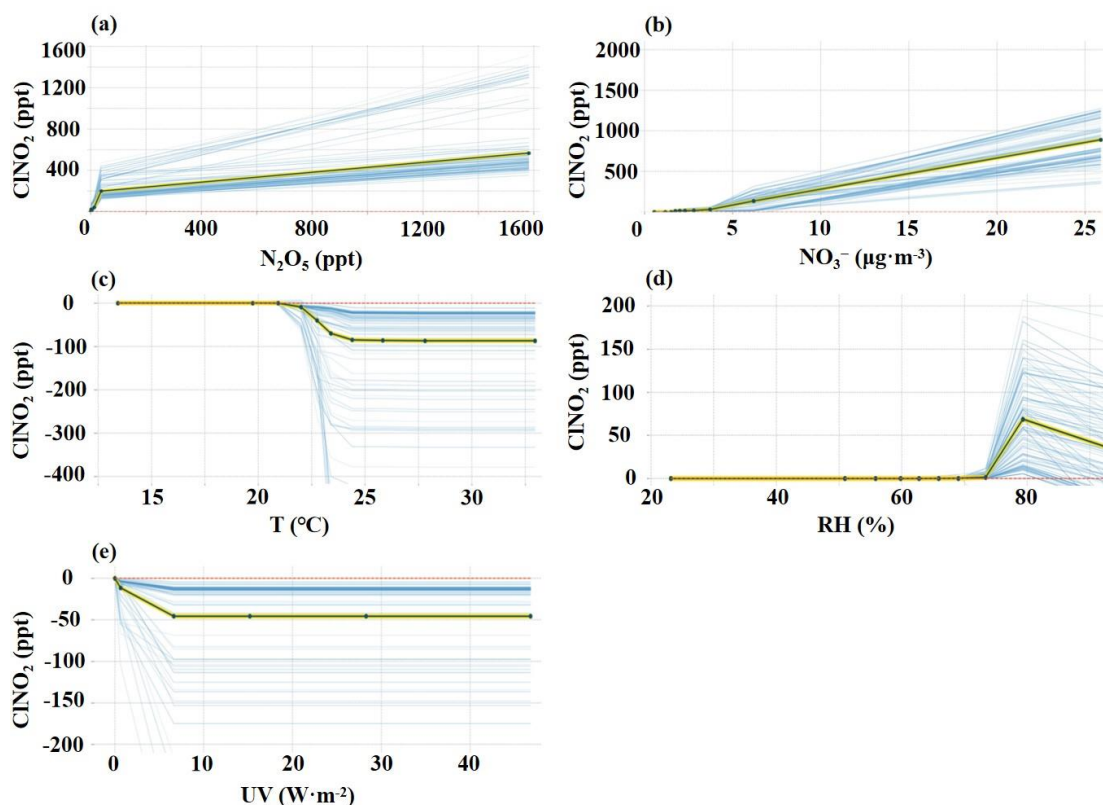

Figure 4. Isolation plots of PDP for  $\text{N}_2\text{O}_5$  (a),  $\text{NO}_3^-$  (b), T (c), RH (d), and UV (e). The average variations of simulated  $\text{ClNO}_2$  with factors' changes spline are indicated by the yellow and black curve, and blue curves presents all situations during the whole observation period.

## References

- Dalton, E. Z., Hoffmann, E. H., Schaefer, T., Tilgner, A., Herrmann, H., and Raff, J. D.: Daytime Atmospheric Halogen Cycling through Aqueous-Phase Oxygen Atom Chemistry, *J. Am. Chem. Soc.*, 145, 15652-15657, <https://doi.org/10.1021/jacs.3c03112>, 2023.
- Niu, Y.-B., Zhu, B., He, L.-Y., Wang, Z., Lin, X.-Y., Tang, M.-X., and Huang, X.-F.: Fast Nocturnal Heterogeneous Chemistry in a Coastal Background Atmosphere and Its Implications for Daytime Photochemistry, *J. Geophys. Res. Atmos.*, 127, e2022JD036716, <https://doi.org/10.1029/2022JD036716>, 2022.
- Tan, Z., Fuchs, H., Hofzumahaus, A., Bloss, W. J., Bohn, B., Cho, C., Hohaus, T., Holland, F., Lakshminisha, C., Liu, L., Monks, P. S., Novelli, A., Niether, D., Rohrer, F.,

Tillmann, R., Valkenburg, T. S. E., Vardhan, V., Kiendler-Scharr, A., Wahner, A., and Sommariva, R.: Seasonal variation in nitryl chloride and its relation to gas-phase precursors during the JULIAC campaign in Germany, *Atmos. Chem. Phys.*, 22, 13137-13152, <https://doi.org/10.5194/acp-22-13137-2022>, 2022.
